1 **Ppara $\alpha$  and fatty acid oxidation coordinate hepatic transcriptional architecture.**

2 Running title: Fatty acids alter the epigenome.

3

4 **Kyle S. Cavagnini,<sup>1</sup> and Michael J. Wolfgang<sup>1,2,3\*</sup>**

5

6 <sup>1</sup>Department of Biological Chemistry, <sup>2</sup>Pharmacology and Molecular Sciences,

7 The Johns Hopkins University School of Medicine, Baltimore, Maryland.

8

9 <sup>3</sup>Lead Contact

10 \*Address correspondence to: **Michael J. Wolfgang, Ph.D.**, Department of Biological Chemistry,  
11 Johns Hopkins University School of Medicine, 855 N. Wolfe St., 475 Rangos Building, Baltimore,  
12 MD 21205, Tel: 443-287-7680, Email: [mwolfga1@jhmi.edu](mailto:mwolfga1@jhmi.edu)

13

14

15

16 **HIGHLIGHTS**

- 17 • Fasting-induced transcription and histone acetylation are largely independent of acetyl-  
18 CoA concentration.
- 19 • Deficits in fatty acid oxidation prompt epigenetic changes and Ppara $\alpha$ -sensitive  
20 transcription.
- 21 • Fasting prompts enhancer priming and acetylation proximal to Ppara $\alpha$  binding sites  
22 independent of Ppara $\alpha$ .
- 23 • Patterns of Ppara $\alpha$  target genes can be distinguished by epigenetic marks at promoters  
24 and enhancers.

25

## 26 **ABSTRACT**

27 Fasting requires tight coordination between the metabolism and transcriptional output of  
28 hepatocytes to maintain systemic glucose and lipid homeostasis. Genetically-defined deficits in  
29 hepatic fatty acid oxidation result in dramatic fasting-induced hepatocyte lipid accumulation and  
30 induction of genes for oxidative metabolism, thereby providing a mouse model to interrogate the  
31 mechanisms by which the liver senses and transcriptionally responds to fluctuations in lipid levels.  
32 While fatty acid oxidation is required for a rise in acetyl-CoA and subsequent lysine acetylation  
33 following a fast, changes in histone acetylation (total, H3K9ac, and H3K27ac) associated with  
34 transcription do not require fatty acid oxidation. Instead, excess fatty acids prompt induction of  
35 lipid catabolic genes largely via ligand-activated Ppara. We observe that active enhancers in  
36 fasting mice are enriched for Ppara binding motifs, and that inhibition of hepatic fatty acid  
37 oxidation results in elevated enhancer priming and acetylation proximal to Ppara binding sites  
38 within regulatory elements largely associated with genes in lipid metabolism. Also, a greater  
39 number of Ppara-associated H3K27ac signal changes occur at active enhancers compared to  
40 promoters, suggesting a genomic mechanism for Ppara to tune target gene expression levels.  
41 Overall, these data demonstrate the requirement for Ppara activation in maintaining  
42 transcriptionally permissive hepatic genomic architecture particularly when fatty acid oxidation is  
43 limiting.

44

## 45 **INTRODUCTION**

46 The liver is a principle regulator of systemic lipid physiology. In this role the hepatocyte requires  
47 signaling mechanisms by which to sense and respond to fluctuations in lipid availability. This is  
48 especially important during periods of nutrient deprivation, such as fasting (George, 2006).  
49 Fasting stimulates fatty acid mobilization from adipose, whereby they are taken up and broken  
50 down in the liver via mitochondrial  $\beta$ -oxidation to provide hepatocytes with ATP, NADH, and  
51 acetyl-CoA (Stern et al., 2016; The and Schulz, 1991). Errors in these fundamental catabolic

52 processes result in metabolic aberrations, such as fasting hypoketotic-hypoglycemia, and can  
53 also contribute to the pathogenesis and progression of conditions such as diabetes, obesity,  
54 and chronic liver disease (Asrani et al., 2019; Gong et al., 2017; Houten et al., 2016; Ponziani et  
55 al., 2015).

56 The nuclear hormone receptor peroxisome proliferator-activated receptor alpha (Ppar $\alpha$ )  
57 plays a governing role in regulating hepatic lipid homeostasis and is thus a key component of  
58 the fasting response (Kersten, 2014; Kersten et al., 1999; Leone et al., 1999). Upon activation  
59 by lipid ligands, such as long chain fatty acids, Ppar $\alpha$  and its heterodimer partner retinoid X  
60 receptor alpha (RXR $\alpha$ ) will bind to DNA and effect transcription of target genes (Bardot et al.,  
61 1993; Boergesen et al., 2012; Evans and Mangelsdorf, 2014; Gearing et al., 1993). This  
62 transcriptional program includes genes for mitochondrial and peroxisomal  $\beta$ -oxidation,  
63 microsomal  $\omega$ -oxidation, and ketogenesis (Aoyama et al., 1998; Mandard et al., 2004;  
64 Rakhshandehroo et al., 2009). It prompts induction of regulators for mitochondrial metabolism  
65 such as carnitine palmyltransferase 1a (*Cpt1a*) and pyruvate dehydrogenase kinase 4 (*Pdk4*),  
66 which respectively promote mitochondrial fatty acid import and inhibit pyruvate oxidation,  
67 (Huang et al., 2002; Song et al., 2010; Wu et al., 2001). Ppar $\alpha$  also activates transcription of  
68 pro-catabolic hepatokines such as fibroblast growth factor 21 (*Fgf21*), which help mediate the  
69 adaptive starvation response systemically (Inagaki et al., 2007; Iroz et al., 2017). Ppar $\alpha$   
70 knockout mice display diminished transcription of these and other genes for oxidative  
71 metabolism, which over time contributes to hepatic lipid accumulation and steatosis (Aoyama et  
72 al., 1998; Kersten et al., 1999; Leone et al., 1999; Reddy, 2001; Ruppert et al., 2019).

73 Transcription factor binding hubs, such as promoters and enhancer elements, play a  
74 fundamental role in regulating hepatic transcription (Goldstein and Hager, 2015; Jump et al.,  
75 2013; Karagianni and Talianidis, 2015; Qin et al., 2020). Enhancers are cis-regulatory genetic  
76 elements that facilitate transcription initiation and processivity; they are classified as silenced,  
77 poised, or active (Creyghton et al., 2010). Poised enhancers are marked by enrichment of

78 epigenetic modifications including H3K4me1 and H3K27me3 (Calo and Wysocka, 2013; Heinz  
79 et al., 2015). Active enhancers are marked by a coincidence of H3K4me1 and H3K27ac, as  
80 well as increased chromatin accessibility and the presence of histone acetyltransferases such  
81 as p300 (Andersson and Sandelin, 2020; Creyghton et al., 2010; Raisner et al., 2018). The  
82 hepatic fasting response requires careful balance between gluconeogenesis and ketogenesis.  
83 The interplay between each process is in part governed by transcription factor binding patterns,  
84 including changes in the active enhancer landscape. Glucocorticoid receptor (GR)-assisted  
85 loading of cAMP responsive element binding protein I promotes activation of gluconeogenic  
86 enhancers (Goldstein et al., 2017). In contrast, ketogenic enhancers are proposed to have a  
87 more gradual enhancer maturation which is correlated to GR-stimulated expression of Ppar $\alpha$   
88 and increased chromatin accessibility in proximity to Ppar $\alpha$  binding motifs (Goldstein et al.,  
89 2017). Moreover, Ppar $\alpha$  binding has been directly detected at fasting-induced enhancers using  
90 ChIP-seq (Lee et al., 2014; Sommars et al., 2019). Ppar $\alpha$ -null mice have suppressed indicators  
91 for active enhancers, including decreased enhancer RNA levels and H3K27ac ChIP-seq signal  
92 (Guan et al., 2018; Sommars et al., 2019).

93 In this study we take advantage of mice with a genetically-defined deficit in hepatic fatty  
94 acid oxidation to further investigate the contribution of Ppar $\alpha$  in regulating the hepatic fasting  
95 transcriptional landscape, including a close inspection of its activity at active enhancers.  
96 Carnitine palmyltransferase 2 (Cpt2) is a required enzyme for the transport of long chain fatty  
97 acids into the mitochondria (Houten et al., 2016). Its loss deprives the mitochondria of fatty acid  
98 substrate, and it is thus an obligate enzyme for mitochondrial  $\beta$ -oxidation. During a fast, mice  
99 with a liver-specific deletion of Cpt2 (Cpt2<sup>L-/-</sup>) are unable to clear excess lipid (Lee et al., 2016).  
100 This results in drastic fatty acid accumulation accompanied by augmented transcription of many  
101 Ppar $\alpha$  target genes (Lee et al., 2016). These mice are therefore a model of Ppar $\alpha$  activation by  
102 build-up of endogenous lipid ligands. We use this system to further explore the effect of hepatic

103 lipid sensing on gene activation, and the role for Ppar $\alpha$  activation in maintaining transcriptionally  
104 permissive chromatin. In particular we describe distinct patterns of Ppar $\alpha$  target gene  
105 transcription that are distinguished by epigenetic marks at promoters and enhancers. We  
106 further observe that Ppar $\alpha$ -sensitive enhancers are largely associated with lipid metabolism, and  
107 deficits in fatty acid oxidation prompt elevated priming and acetylation at these loci. Altogether  
108 our findings provide genomic insight into how fatty acids alter the epigenome to affect  
109 transcription during periods of nutrient deprivation.

110

## 111 **RESULTS**

### 112 **Impaired hepatic mitochondrial fatty acid oxidation elicits putative Ppar $\alpha$ target genes** 113 **despite a suppression in lysine acetylation.**

114 Mice lacking hepatic Cpt2 (Cpt2<sup>L-/-</sup>) are unable to utilize long chain fatty acids for mitochondrial  
115  $\beta$ -oxidation. Following a fast, this results in fatty liver and dramatic induction of pro-catabolic  
116 hepatic genes, thereby providing a useful genetic model to interrogate fatty-acid stimulated  
117 transcription (Bowman et al., 2019; Lee et al., 2016). To fully characterize the transcriptional  
118 landscape of the fasting Cpt2<sup>L-/-</sup> liver, we performed RNA-seq on livers harvested from 9-week  
119 old wildtype (WT) and Cpt2<sup>L-/-</sup> mice fasted for 24 hours (**Fig. 1a, Table S1**). This expanded  
120 upon our previously published observations that impaired hepatic  $\beta$ -oxidation is associated with  
121 augmented fasting-induced transcription of genes for regulation of mitochondrial metabolism  
122 (*Pdk4*), regulation of peroxisomal metabolism (*Ehhadh*), and pro-catabolic hepatokines (*Fgf21*)  
123 (Lee et al., 2016). Indeed, gene ontology for all significantly upregulated transcripts (Cpt2<sup>L-/-</sup>/WT  
124 fold change  $\geq 2$ , padj  $< 0.05$ ) returned several terms for fatty acid metabolism (**Fig. S1a**). We  
125 next performed TMT-based quantitative proteomics to confirm the induction of these genes at  
126 the protein level (**Table S2**). We found that, in parallel to the RNA-seq data, Cpt2<sup>L-/-</sup> upregulated  
127 peptides were enriched for gene ontology terms related to fatty acid biology (**Fig. S1b, S1c**).  
128 These results provide additional evidence demonstrating that impaired  $\beta$ -oxidation triggers a

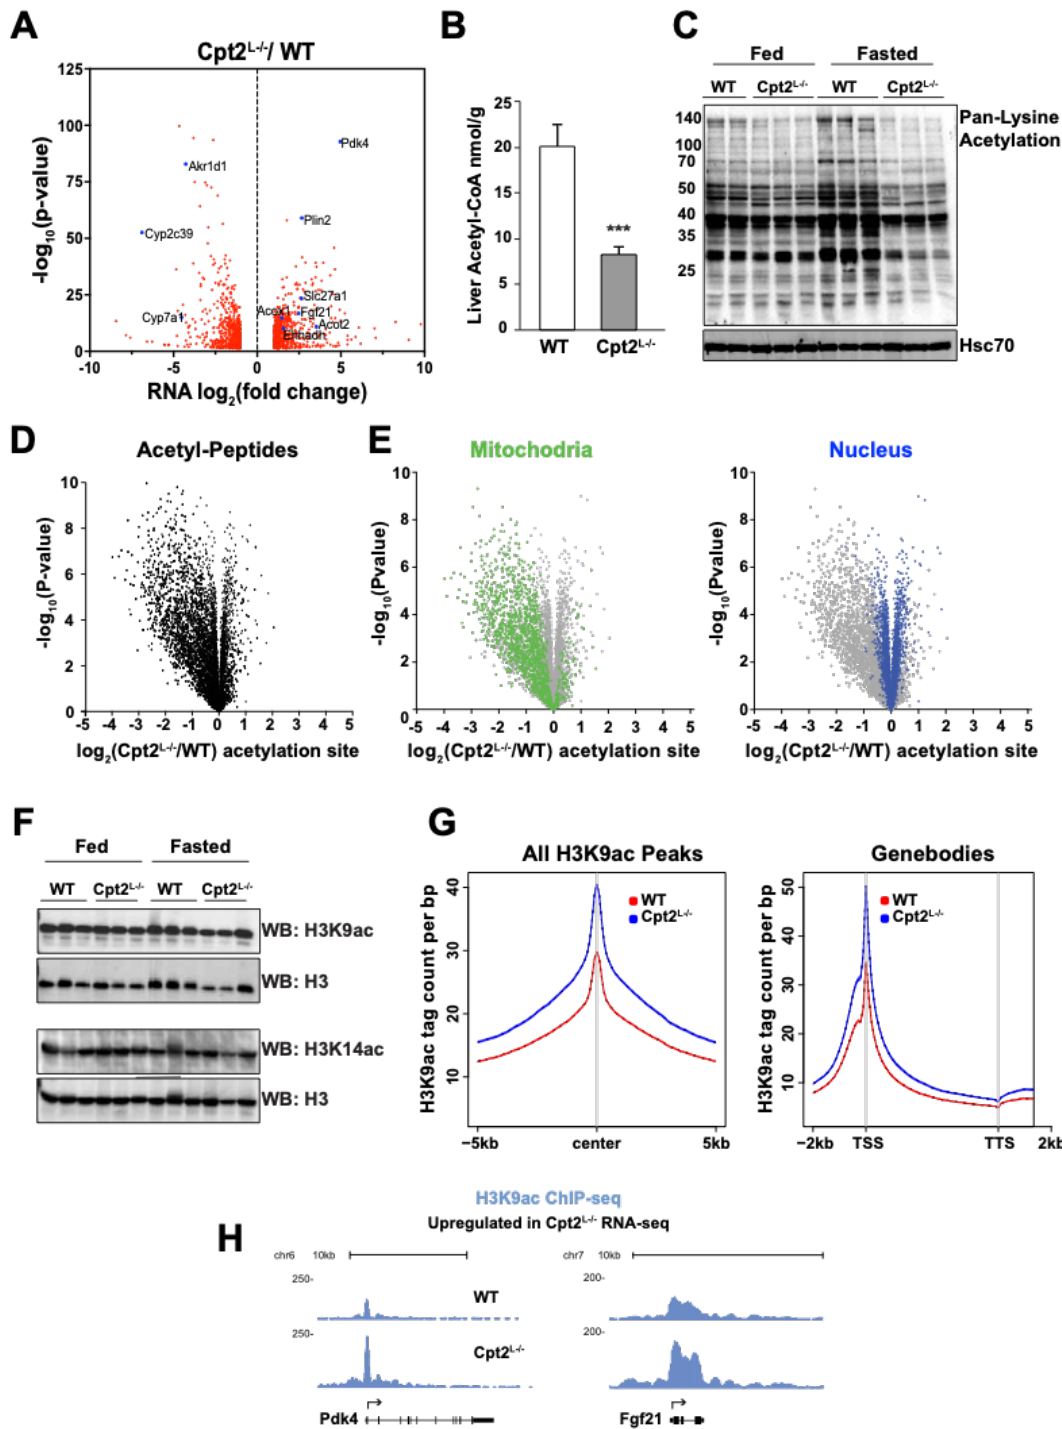

**Fig 1. Fasted Cpt2<sup>L-/-</sup> liver exhibits deficits in lysine-acetylation along with metabolic gene induction.**

- A. Volcano plot displaying differentially expressed transcripts (fold change  $\geq |2|$ , padj  $< 0.05$ ) between 24hr fasted WT and Cpt2<sup>L-/-</sup> liver as determined by RNA-seq (n=4).
- B. Tissue acetyl-CoA concentration from 24hr fasted WT and Cpt2<sup>L-/-</sup> liver (n=6, mean  $\pm$  SEM). Significance determined using Student two-tailed t test, \*\*\*\*p  $< 0.001$ .
- C. Western blot for acetyl-lysine and HSC70 loading control in fed and fasted WT and Cpt2<sup>L-/-</sup> livers.
- D. Volcano plots showing magnitude and significance for fasted liver acetyl-proteome, measured by TMT-based quantitative mass spectrometry (n=5).
- E. Volcano plots showing magnitude and significance for mitochondrial acetyl-proteome and nuclear acetyl-proteome.
- F. Representative Western blot of acid-precipitated histones from fed and fasted WT and Cpt2<sup>L-/-</sup> liver tissue.  
 (legend continued on next page)

**Fig 1. Fasted Cpt2<sup>L-/-</sup> liver exhibits deficits in lysine-acetylation along with metabolic gene induction.**

- G. Aggregation plot depicting liver H3K9ac ChIP-seq mean tag density for (*left*) all H3K9ac ChIP-seq peak centers with  $\pm 5$ kb flanking regions and (*right*) across all gene bodies with  $\pm 2$ kb flanking regions. TSS = transcription start site, TTS = transcription termination site. n=1
- H. H3K9ac ChIP-seq genome browser tracks for representative genes that are upregulated in Cpt2<sup>L-/-</sup> RNA-seq, showing increased ChIP-seq signal in the fasted Cpt2<sup>L-/-</sup> liver.

130 compensatory transcriptional program in an attempt to relieve the lipid burden, a process which  
131 includes shuttling fatty acids into other metabolic pathways such as peroxisomal oxidation.

132 Others have suggested that fatty acid oxidation promotes transcription for lipid  
133 catabolism via histone acetylation from fatty acid-derived acetyl-CoA (McDonnell et al., 2016).  
134 We observed that Cpt2<sup>L-/-</sup> mice exhibited suppressed hepatic acetyl-CoA concentration and  
135 failed to induce protein acetylation following a fast, which therefore allowed us to examine this  
136 hypothesis *in vivo* (**Fig. 1b, 1c**). To gain a more granular view of the proteins that exhibited  
137 hypoacetylation, we mapped and quantified protein acetylation via TMT-based mass  
138 spectrometry (**Fig. 1d, Table S3**). We found that mitochondrial protein acetylation was  
139 suppressed in Cpt2<sup>L-/-</sup> mice as expected due to a lack of mitochondrial  $\beta$ -oxidation (**Fig. 1e,**  
140 **S1e**). In fact, lysine acetylation was globally reduced in Cpt2<sup>L-/-</sup> mice with the noted exception of  
141 nuclear peptides, which retained comparable levels of acetylation between WT and Cpt2<sup>L-/-</sup> mice  
142 (**Fig. 1e, S1d**). These data indicate that the deficit in mitochondrial  $\beta$ -oxidation limits liver  
143 acetyl-CoA substrate for lysine acetylation, with the exception of the nucleus where acetyl-lysine  
144 levels appear buffered.

145 Analysis of acetyl-histone peptides provides evidence against bulk histone acetylation as  
146 a primary driver of transcriptional activation. 91 unique acetyl-histone peptides were detected in  
147 the acetyl-proteome, of which none were hyperacetylated, 38.5% were hypoacetylated and the  
148 remaining 61.5% showed no significant change to acetylation state between Cpt2<sup>L-/-</sup> and WT  
149 animals (**Table S3**). Consistent with those data, bulk changes in histone acetylation were not  
150 observed for histone marks H3K9ac or H3K14ac (**Fig. 1f**). To gain detailed insight into fatty  
151 acid oxidation-dependent histone acetylation, we next turned to ChIP-seq for H3K9ac. Global  
152 H3K9ac levels were higher in Cpt2<sup>L-/-</sup> liver, including at gene promoters, consistent with the  
153 augmented transcriptional profile of Cpt2<sup>L-/-</sup> mice (**Fig. 1g**). Local patterns of H3K9ac gene body



154 occupancy trended with RNA-seq fold-change (**Fig. 1h, S1f**). These data are not consistent  
155 with the notion that the fatty acid oxidation-dependent generation of acetyl-CoA is a primary  
156 driver of gene expression via an epigenetic mechanism, but rather point towards another lipid  
157 sensing mechanism for transcriptional activation.

158 To better understand how fatty acids affect the chromatin landscape, including promotor  
159 accessibility and binding motifs for transcription factors induced in fasting  $Cpt2^{L-/-}$  liver, we next  
160 turned to Assay for Transposase Accessible Chromatin Sequencing (ATAC-seq). ATAC-seq  
161 profiles of fasted  $Cpt2^{L-/-}$  and WT liver tissues were overall similar. A total of 69,485 ATAC-seq  
162 sites were measured across all samples, of which 75.6% are shared by both fasted  $Cpt2^{L-/-}$  and  
163 WT animals (**Fig. 2a**).  $Cpt2^{L-/-}$  livers had a notable increase in chromatin accessibility near  
164 transcription start sites (**Fig. 2b**). Of the 9273 differentially upregulated ATAC sites (fold change  
165  $Cpt2^{L-/-}/WT \geq +2$ ), 16% were detected in gene promoters. Differential accessibility aligned with  
166 RNA-seq trends (**Fig. 2c, S2a**). Motif analysis on ATAC peaks found at gene promoters for  
167 upregulated  $Cpt2^{L-/-}$  transcripts revealed  $Ppar\alpha$  and its heterodimer binding partner  $Rxr$  as the  
168 top hits (**Fig. 2d**).  $Ppar\alpha$  targets are often defined by their response to a  $Ppar\alpha$  agonist, such as  
169 WY-14643 (Brocker et al., 2020; Janssen et al., 2015; Lee et al., 1995; Li et al., 2018;  
170 Rakhshandehroo et al., 2007). We determined that 52% of genes upregulated in  $Cpt2^{L-/-}$  animals  
171 are sensitive to WY-14643 (**Fig. 2e**) (Naiman et al., 2019). Together, the proteomic, acetyl-  
172 proteomic, RNA-seq, ATAC-seq and H3K9ac ChIP-seq data suggest that deficits in hepatic fatty  
173 acid oxidation by the loss of  $Cpt2$  elevates endogenous lipid ligands to induce  $Ppar\alpha$  at  
174 promoters of genes important for lipid catabolism despite a suppression in acetyl-CoA.

175  
176  **$Ppar\alpha$ ,  $Cpt2^{L-/-}$  double knockout mice demonstrate  $Ppar\alpha$  dependent and independent**  
177 **transcription.**

178 Given the abundance of putative  $Ppar\alpha$  target genes and enrichment for  $Ppar\alpha$  promoter  
179 binding motifs in fasted  $Cpt2^{L-/-}$  livers, we decided to define the requirement for  $Ppar\alpha$  in



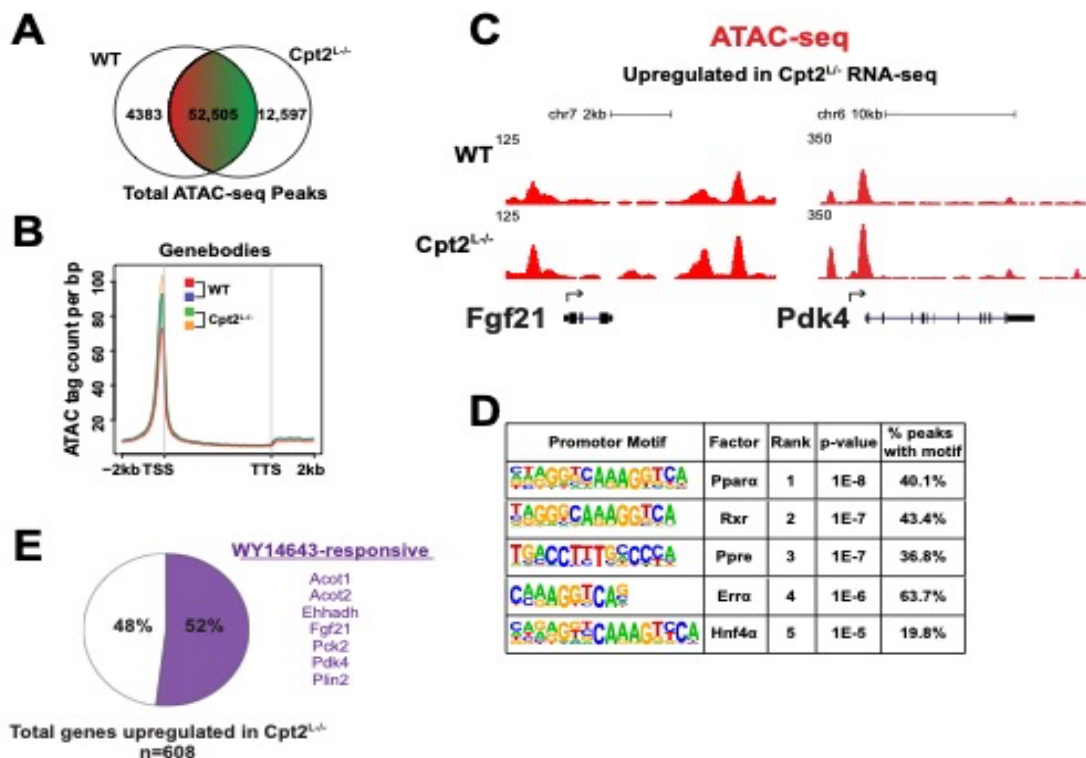

**Fig 2. Fasting-induced genes in Cpt2<sup>L-/-</sup> liver are Ppara $\alpha$ -responsive**

- A. Venn diagram showing unique and shared ATAC-seq peaks detected in fasted WT and Cpt2<sup>L-/-</sup> liver (n=2).
- B. Aggregation plot depicting liver ATAC-seq mean tag density for all gene bodies with  $\pm 2$ kb flanking regions. TSS = transcription start site, TTS = transcription termination site.
- C. ATAC-seq genome browser tracks for representative genes that were upregulated in Cpt2<sup>L-/-</sup> RNA-seq.
- D. Top results from HOMER enrichment analysis for known motifs in ATAC-seq promoter peaks for genes induced in Cpt2<sup>L-/-</sup> liver.
- E. Pie chart depicting Cpt2<sup>L-/-</sup> induced genes previously shown to respond to the Ppara $\alpha$  agonist WY-14643 (GSE140063, Naiman et al., 2019) .

181 the transcriptional response of  $Cpt2^{L-/}$  mice by generating double knockout (DKO) mice.  
182  $Cpt2^{L-/};Ppar\alpha^{-/-}$  DKO animals were generated using mice harboring a whole-body deletion of  
183  $Ppar\alpha$  ( $Ppar\alpha^{-/-}$ ) bred to  $Cpt2^{L-/}$  mice. Subsequent experiments in this study were conducted  
184 using 24hr fasted 9-week old WT,  $Cpt2^{L-/}$ ,  $Ppar\alpha^{-/-}$ , and DKO mice. All genotypes were viable  
185 and fertile and were not associated with changes in body weight (**Fig. 3a**). We have previously  
186 shown that fasted  $Cpt2^{L-/}$  mice have significantly increased liver mass due to excess fatty acids;  
187 the DKO mice share this phenotype (**Fig. 3b**). While  $Cpt2^{L-/}$  mice did not exhibit differences in  
188 fasting glycemia compared to controls,  $Ppar\alpha^{-/-}$  and DKO mice exhibited mild fasting  
189 hypoglycemia (**Fig. 3c**). This phenotype was previously described for fasted  $Ppar\alpha^{-/-}$  animals  
190 (Kersten et al., 1999).  $Ppar\alpha^{-/-}$  mice had approximately half of the circulating fasting ketone  
191 bodies such as  $\beta$ -hydroxybutyrate ( $\beta$ HB) compared to WT animals (**Fig. 3d**). However,  $Cpt2^{L-/}$   
192 and DKO mice did not produce  $\beta$ HB following a 24hr fast, demonstrating a requirement for  
193 hepatic fatty acid oxidation for ketone body generation.

194 To better understand the physiological impact of impaired hepatic  $\beta$ -oxidation and  $Ppar\alpha$   
195 loss, we performed global untargeted metabolomics on serum (**Fig. 3e, Table S4**). Principle  
196 component analysis (PCA) showed that loss of  $Ppar\alpha$  caused broad perturbations to the serum  
197 metabolome, more so than loss of  $Cpt2^{L-/}$  alone (**Fig. 3e, S3a**). This emphasizes the  
198 importance of  $Ppar\alpha$  for systemic fasting physiology. These perturbations were compounded in  
199 the DKO animals, which showed the greatest variation from WT controls. We've previously  
200 reported that fasted  $Cpt2^{L-/}$  mice show depleted serum short- and medium-chain acyl-carnitines  
201 (Lee et al., 2016). DKO mice phenocopy  $Cpt2^{L-/}$  serum levels of medium- and long-chain acyl  
202 carnitines, indicating that this is likely a shared metabolic sink for the excess fatty acid in  $Cpt2^{L-/}$   
203 livers (**Fig. S3b**). These data overall demonstrate that the loss of  $Ppar\alpha$  and/or the loss of  
204 hepatic fatty acid oxidation result in systemic metabolic perturbations.

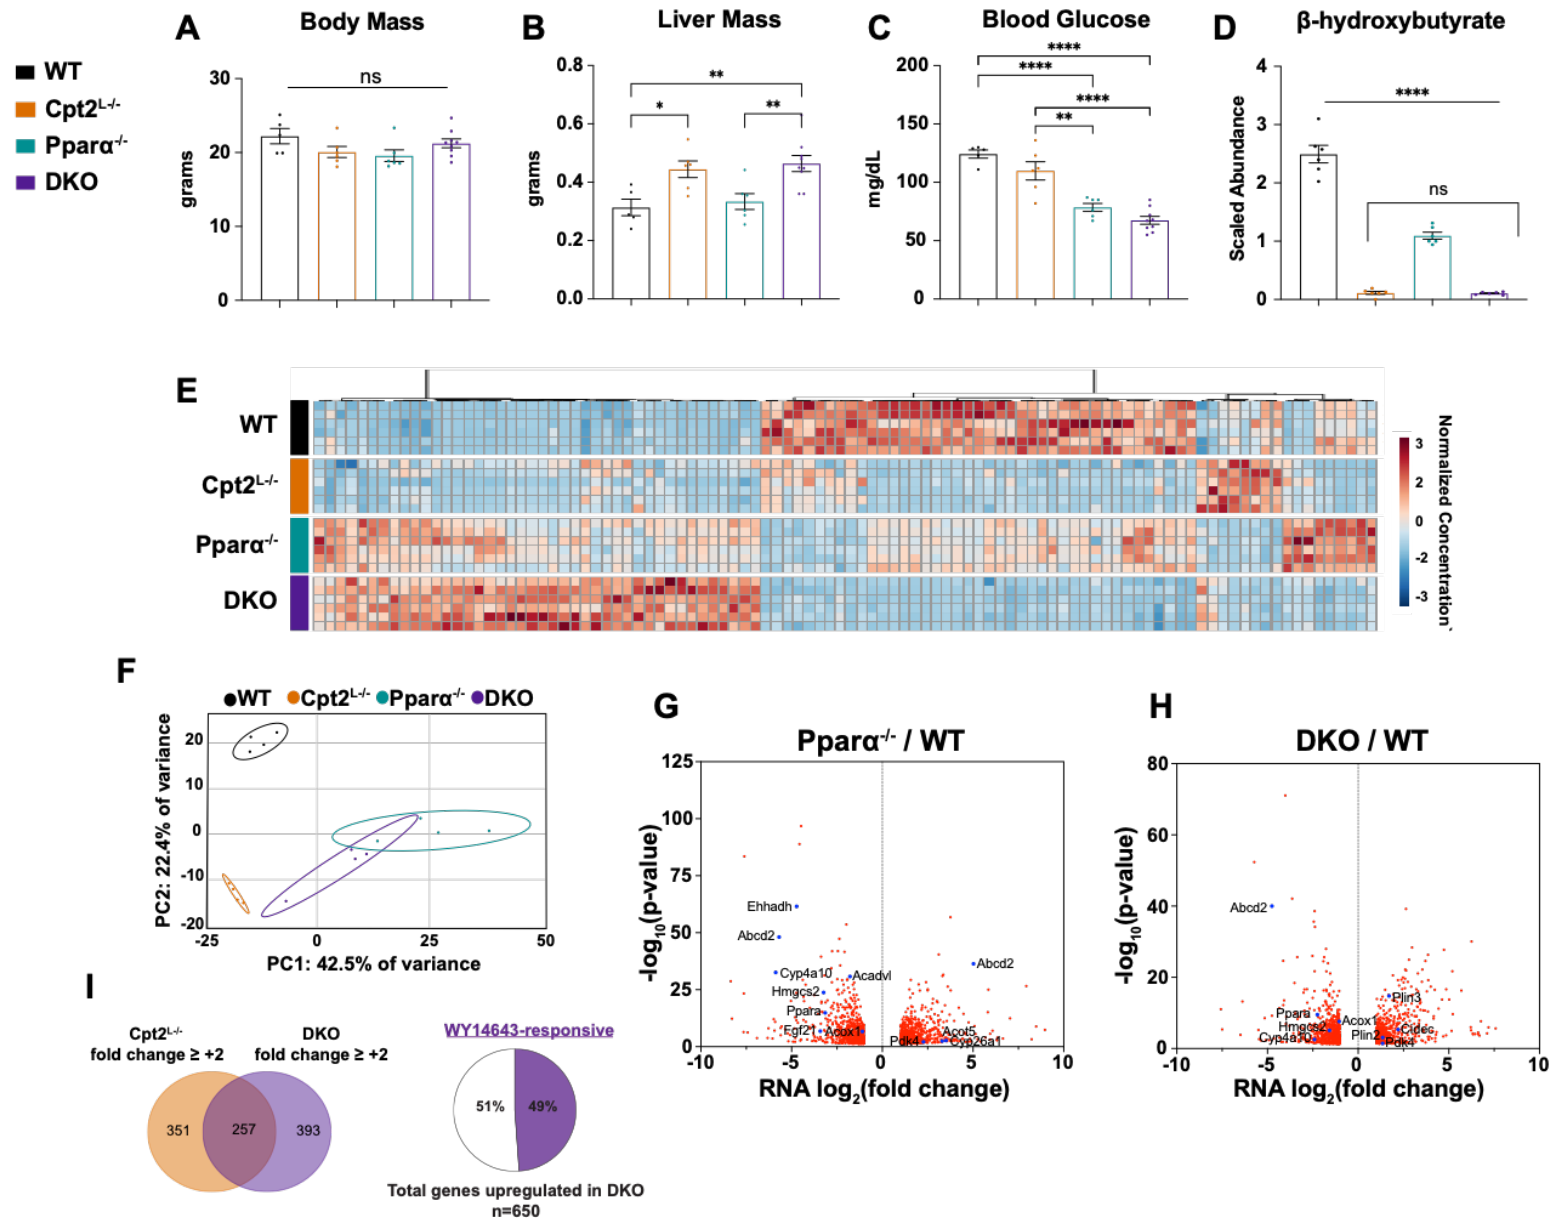

### Fig 3. Ppara, Cpt2<sup>L-/-</sup> double knockout mice retain transcription of Ppara target genes

- A. Body weight of male fasted WT, Cpt2<sup>L-/-</sup>, Ppara<sup>-/-</sup>, and Cpt2<sup>L-/-</sup>;Ppara<sup>-/-</sup> (DKO) animals (n=6-10 mean  $\pm$  SEM).  
 B. Wet liver weight from fasted animals (n=6-10, mean  $\pm$  SEM).  
 C. Blood glucose from fasted animals (n=6-10, mean  $\pm$  SEM).  
 D. Serum levels of  $\beta$ -hydroxybutyrate from fasted animals determined by median-scaled untargeted metabolomics (n=6, mean  $\pm$  SEM).  
 E. Heatmap of top 100 differentially regulated serum metabolites from fasted animals (n=6).  
 F. Principle component analysis of RNA-seq on fasted WT, Cpt2<sup>L-/-</sup>, Ppara<sup>-/-</sup>, and DKO liver (n=4).  
 G. Volcano plot displaying RNA-seq differentially expressed transcripts between 24hr fasted WT and Ppara<sup>-/-</sup> livers.  
 H. Volcano plot displaying RNA-seq differentially expressed transcripts between 24hr fasted WT and DKO livers.  
 I. (left) Venn diagram depicting overlap between genes upregulated in Cpt2<sup>L-/-</sup> and DKO liver compared to WT. (right) Pie chart depicting DKO fasting-induced genes known to respond to the Ppara agonist WY14643.  
 RNA-seq significance cutoff is fold change  $\geq |2|$ , padj < 0.05. One-way ANOVA followed by Tukey's post-hoc test was performed as appropriate. \*p < 0.05; \*\*p < 0.01; \*\*\*p < 0.001; \*\*\*\*p < 0.0001; ns, not significant.

206 We next sought to determine the extent to which *Pparα* is implicated in the fasting-  
207 induced *Cpt2*<sup>L-/-</sup> transcriptional response by carrying out RNA-seq on WT, *Cpt2*<sup>L-/-</sup>, *Pparα*<sup>-/-</sup>, and  
208 DKO livers (**Table S1**). PCA of RNA-seq data revealed that the transcriptional signature for  
209 *Pparα*<sup>-/-</sup> mice overlapped with that of DKO mice, while those for WT and *Cpt2*<sup>L-/-</sup> animals were  
210 distinct from the other genotypes (**Fig. 3f**). There were 330 differentially expressed transcripts  
211 shared between the three knockout genotypes compared to WT animals (KO/WT fold change ≥  
212 |2|, padj < 0.05) (**Fig. S3c**). In line with overall transcriptional signatures, a greater number of  
213 differentially expressed genes were shared between the *Pparα*<sup>-/-</sup> and DKO mice compared to  
214 *Cpt2*<sup>L-/-</sup> mice. These findings are not unexpected given the central role for *Pparα* in regulating  
215 the hepatic genes necessary for fasting oxidative metabolism.

216 The loss of *Pparα* alone suppressed transcription of genes for fatty acid catabolism and  
217 ketogenesis, including *Ehhadh*, *Hmgcs2*, and *Fgf21* (**Fig. 3g**). Many of these genes displayed  
218 blunted expression in DKO livers as well (**Fig. 3h**). Curiously, several canonical *Pparα* target  
219 genes, such as *Plin2* and *Pdk4*, retained induction in DKO liver compared to control animals  
220 (**Fig. 3h**). Further analysis of the RNA-seq data revealed that *Cpt2*<sup>L-/-</sup> and DKO animals shared  
221 257 upregulated transcripts, respectively representing 42% and 40% of induced genes for those  
222 genotypes (**Fig. 3i**). This suggested that there may be a transcriptional program triggered by  
223 the shared metabolic perturbations presented by loss of hepatic β-oxidation. Further, 49% of  
224 induced transcripts in DKO are responsive to WY-14643 (**Fig. 3i**) (Naiman et al., 2019). We  
225 therefore hypothesized that a subset of genes, which are typically thought to rely upon *Pparα* for  
226 their induction, have in addition a secondary regulatory mechanism. The limited transcription of  
227 target genes that do not require *Pparα* is likely prompted by excess lipid burden via an  
228 independent mechanism driven by *Err* or *Hnf4α*, for example.

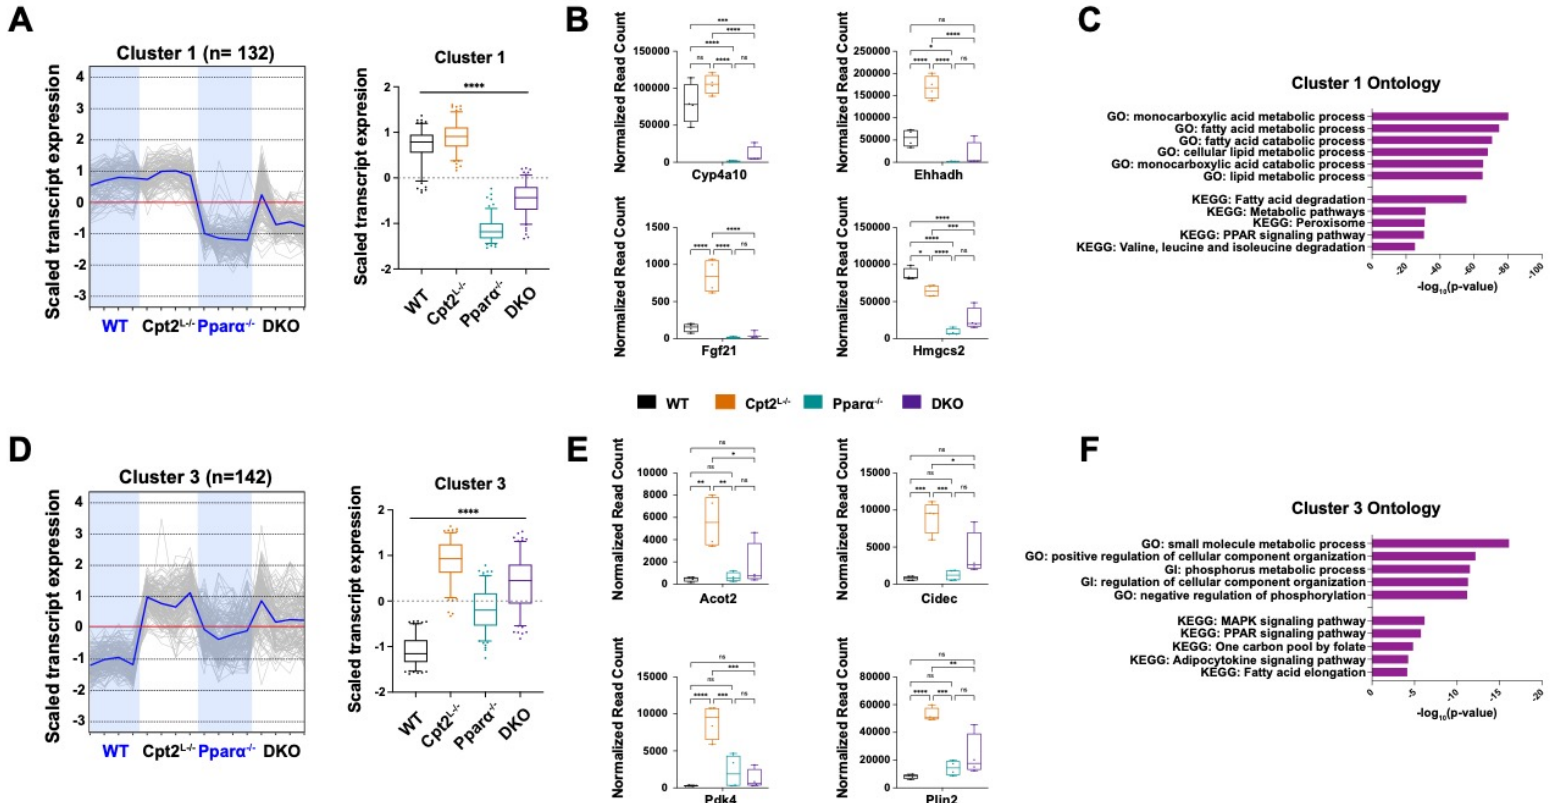

#### Fig 4. Unbiased clustering reveals patterns for Ppara-dependent and Ppara-independent transcription of target genes

- (left) Tracing diagram of cluster 1 genes (Ppara-dependent) from fasted RNA-seq transcript levels. Blue line indicates mean expression. (right) Bar graph quantifying scaled transcript values. Presented as Z-score scaled transcript levels.
- Normalized transcript read counts for select cluster 1 genes.
- Gene ontology for cluster 1 genes ranked by significance.
- (left) Tracing diagram of cluster 3 genes (Ppara-independent) from fasted RNA-seq transcript levels. Blue line indicates mean expression. (right) Bar graph quantifying scaled transcript values. Presented as Z-score scaled transcript levels.
- Normalized transcript read counts for select cluster 3 genes.
- Gene ontology for cluster 3 genes ranked by significance.

One-way ANOVA followed by Tukey's post-hoc test was performed as appropriate. \* $p < 0.05$ ; \*\* $p < 0.01$ ; \*\*\* $p < 0.001$ ; \*\*\*\* $p < 0.0001$ ; ns, not significant. Bar graphs represent 2%-98% percentile.

230 **Impaired hepatic fatty acid oxidation prompts distinct modes of gene regulation.**

231 We subsequently sought further resolution into the role for Ppar $\alpha$  in regulating hepatic  
232 transcription in response to impaired hepatic fatty acid oxidation, including the possibility of  
233 Ppar $\alpha$ -independent regulatory mechanisms. Unbiased k-means clustering was used to identify  
234 unique patterns of gene transcription across all differentially expressed transcripts (**Fig. S4a**,  
235 **Table S5**). Of the five clusters identified, two in particular (1 & 3) were associated with the  
236 Cpt2<sup>L-/-</sup> gene induction signature (**Fig. 4a, 4d**). Notably, these two groups of transcripts display  
237 significantly divergent modes of Ppar $\alpha$ -sensitive transcription.

238 Cluster 1 genes were wholly dependent upon Ppar $\alpha$  for their transcription, as indicated  
239 by their repressed expression in Ppar $\alpha$ <sup>-/-</sup> and DKO fasted liver (**Fig. 4a**). Cluster 1 genes  
240 included multiple canonical Ppar $\alpha$  targets, including *Cyp4a10*, *Ehhadh*, and *Hmgcs2* (**Fig. 4b**,  
241 **S3b**). These genes are respectively implicated in Ppar $\alpha$  regulation of  $\omega$ -oxidation, peroxisomal  
242 oxidation, and ketogenesis (Kersten et al., 2010). Indeed, gene ontology and KEGG pathway  
243 analysis on all Cluster 1 genes returned terms related to fatty acid metabolism and Ppar $\alpha$   
244 signaling (**Fig. 4c**). These data provide further evidence that impaired hepatic fatty acid  
245 oxidation activates Ppar $\alpha$ -dependent transcription upon fasting.

246 Cluster 3 genes were likewise induced in Cpt2<sup>L-/-</sup> mice in a Ppar $\alpha$ -dependent manner.  
247 However, this group differs from the previous cluster in that both Ppar $\alpha$ -null backgrounds  
248 retained baseline expression levels (**Fig. 4d**). Cluster 3 genes thus sustained transcriptional  
249 activity in the absence of Ppar $\alpha$ , yet still required the transcription factor for induction in  
250 response to metabolic perturbations such as a buildup of Ppar $\alpha$  ligands. This group included  
251 canonical Ppar $\alpha$  target genes *Acot2* and *Pdk4*, whose expression in Ppar $\alpha$ -null animals  
252 displayed no significant variation from control animals (**Fig. 4e**). KEGG pathway analysis  
253 returned Ppar Signaling Pathway as a top result (**Fig. 4f**). Curiously, Cluster 3 contained  
254 multiple genes associated with lipid droplets, including four members of the perilipin family



255 (*Plin1-4*) and *Cidec* (Greenberg et al., 2011). *Plin2*, *Plin4*, and *Cidec* are known Ppar $\alpha$  targets  
256 (Francque et al., 2015; Kersten et al., 2010). This suggests that modules of the Ppar $\alpha$   
257 transcription program involve building upon pre-established Ppar $\alpha$ -independent gene  
258 expression patterns to respond to specific hepatocyte metabolic states.

259

### 260 **Distinct Ppar $\alpha$ target genes retain promotor accessibility despite loss of Ppar $\alpha$ .**

261 We next asked how these unique modes of Ppar $\alpha$  target gene transcription were reflected at the  
262 level of chromatin architecture by assessing ATAC-seq from all four genotypes. Loss of Ppar $\alpha$   
263 drastically diminishes chromatin accessibility (**Fig. S5a**). Chromatin landscape remodeling for  
264 the Ppar $\alpha$ -null mice was expected given the transcription factor's crucial role in coordinating  
265 fasting metabolism, yet the severe ATAC-seq signal depletion in gene promoter regions was  
266 particularly striking (**Fig. 5a**). PCA emphasized this disparity, showing that Ppar $\alpha$  and DKO  
267 animals clustered uniquely, while WT and *Cpt2*<sup>L-/-</sup> livers overlapped substantially (**Fig. S5b**). We  
268 further observed there are appreciably fewer changes in discrete peak intensities between  
269 Ppar $\alpha$ <sup>-/-</sup> and DKO animals compared to *Cpt2*<sup>L-/-</sup> and DKO animals (**Fig. 5b**). Together these data  
270 indicate that Ppar $\alpha$  is required for proper upkeep of fasting chromatin dynamics.

271 Cluster 1 genes, those dependent upon Ppar $\alpha$  for their expression, exhibited a common  
272 pattern of promotor chromatin accessibility that is represented by *Fgf21* (**Fig. 5c**). ATAC-seq  
273 genome browser tracks indicated a higher promoter peak signal in the *Cpt2*<sup>L-/-</sup> livers compared  
274 to WT; accessibility was lost under a Ppar $\alpha$ -null background. Indeed, motif analysis on ATAC-  
275 seq promoter peaks for this cluster returned Ppar $\alpha$  and its heterodimer partner Rxr $\alpha$  as the top  
276 two hits (**Fig 5d**). Suppressed chromatin accessibility at loci enriched for Ppar $\alpha$  binding motifs  
277 indicates the need for Ppar $\alpha$  for proper promoter dynamics.



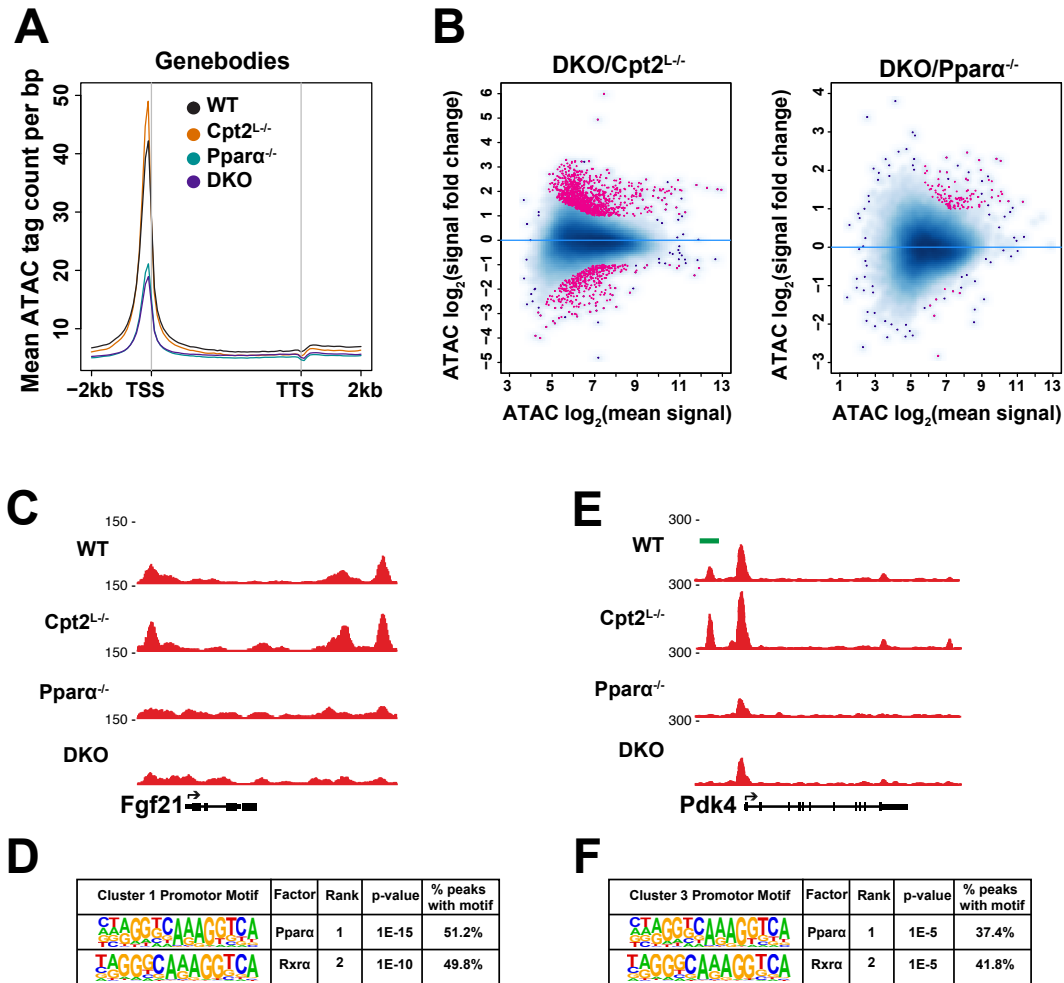

### Fig 5. Loss of *Ppara* remodels genome-wide accessibility

- Aggregation plot depicting liver ATAC-seq mean tag density for all gene bodies with  $\pm 2$ kb flanking regions in fasted WT, *Cpt2*<sup>L-/-</sup>, *Ppara*<sup>-/-</sup>, and DKO liver (n=2). TSS = transcription start site, TTS = transcription termination site.
- MA plot depicting ATAC-seq differential binding analysis results between DKO/*Cpt2*<sup>L-/-</sup> and DKO/*Ppara*<sup>-/-</sup> animals. The x-axis gives the mean signal and the y-axis gives the signal fold change for a given peak. Points in pink are significant (fold change  $\geq 2$ , FDR < 0.05).
- ATAC-seq genome browser tracks for cluster 1 gene *Fgf21*.
- HOMER enrichment analysis for known motifs in ATAC-seq promoter peaks for cluster 1 genes.
- ATAC-seq genome browser tracks for cluster 3 gene *Pdk4*. *Ppara*-sensitive peak interval is indicated by green bar.
- HOMER enrichment analysis for known motifs in ATAC-seq promoter peaks for cluster 3 genes.

279 Promoter accessibility for Cluster 3 genes, those with Ppar $\alpha$ -independent baseline  
280 expression, likewise shared a common promoter chromatin architecture as illustrated by *Pdk4*  
281 (**Fig. 5e**). The Cpt2<sup>L-/-</sup> induction pattern was once again evident in the ATAC-seq signal.  
282 However, in contrast to Cluster 1 genes, this group retained a degree of promoter accessibility  
283 in Ppar $\alpha$ <sup>-/-</sup> and DKO mice. Interestingly, 13% of Cluster 3 genes contained an interval of open  
284 promoter chromatin that was lost in both Ppar $\alpha$ -null animals, including at the promoters for  
285 Ppar $\alpha$  targets *Acot2*, *Fabp3*, *Pdk4*, and *Plin2* (**Fig. 5e** green bar). These likely indicate binding  
286 sites for Ppar $\alpha$  directly or for another DNA regulatory protein that depends on Ppar $\alpha$  for an  
287 aspect of its activity. Cluster 3 ATAC-seq promoter peaks are enriched for Ppar $\alpha$  and Rxr $\alpha$   
288 binding motifs, albeit at a lower rate than for Cluster 1 genes (**Fig. 5f**). These data together  
289 indicate that Cluster 3 promoters do not require Ppar $\alpha$  to maintain accessibility during a fast,  
290 though Ppar $\alpha$  can interact with these loci to augment target gene transcription in response to a  
291 metabolic perturbation.

292

### 293 **Ppar $\alpha$ -dependent and independent promoter acetylation.**

294 Differential promoter accessibility prompted questions as to how the loss of Ppar $\alpha$  affected  
295 promoter dynamics *vis a vis* histone acetylation. We therefore performed ChIP-seq for  
296 H3K27ac, a histone mark generally found at active chromatin (Andersson and Sandelin, 2020).  
297 H3K27ac signal was comparable between genotypes, however Cpt2<sup>L-/-</sup> and DKO livers  
298 displayed higher H3K27ac signal near transcription start sites compared to the WT and Ppar $\alpha$ <sup>-/-</sup>  
299 animals (**Fig. 6a, S6a**). PCA showed that WT and Cpt2<sup>L-/-</sup> H3K27ac distributions were distinct  
300 from one another, while Ppar $\alpha$ <sup>-/-</sup> and DKO animals clustered together (**Fig. 6b**). This is the  
301 inverse of the ATAC-seq PCA, in which WT and Cpt2<sup>L-/-</sup> animals were grouped and Ppar $\alpha$ <sup>-/-</sup> and  
302 DKO animals were separated (**Fig. S5b**). These data indicate that the metabolic perturbations  
303 in Cpt2<sup>L-/-</sup> and DKO livers stimulate a common configuration of H3K27ac occupancy regardless

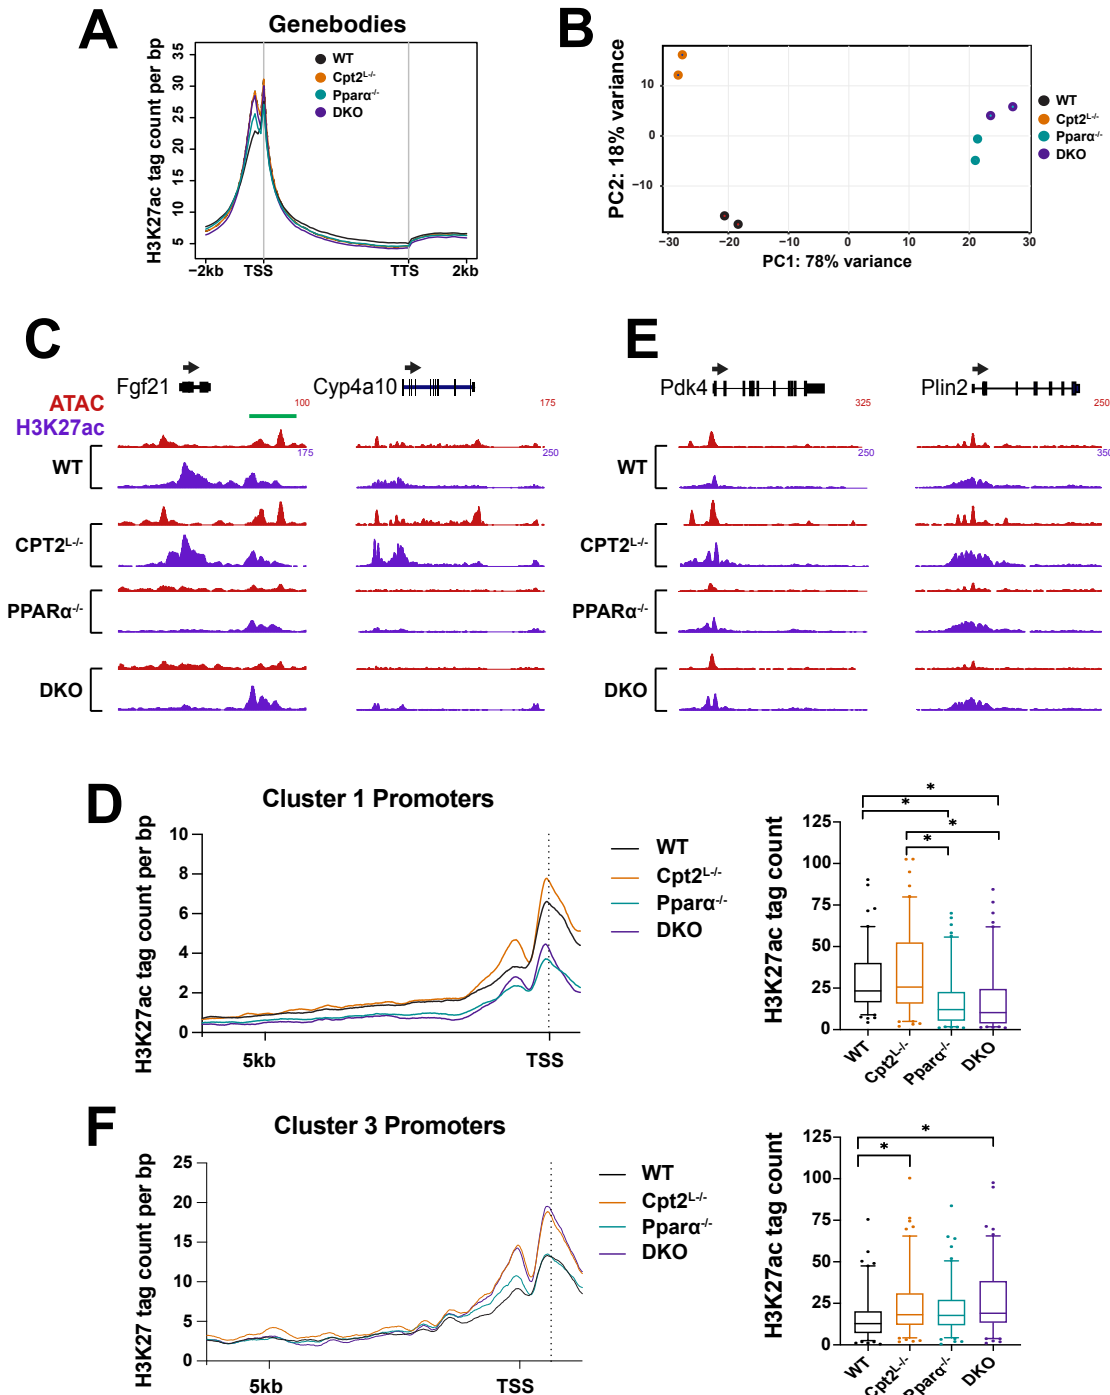

**Fig 6. Differential H3K27ac occupancy patterns at *Ppara* target genes**

- Aggregation plot depicting liver H3K27ac ChIP-seq mean tag density for all gene bodies with  $\pm 2$ kb flanking regions in fasted WT, *Cpt2*<sup>L-/-</sup>, *Ppara*<sup>-/-</sup>, and DKO liver (n=2). TSS = transcription start site, TTS = transcription termination site.
- PCA of H3K27ac ChIP-seq data from fasted WT, *Cpt2*<sup>L-/-</sup>, *Ppara*<sup>-/-</sup>, and DKO liver.
- Genome browser track for cluster 1 genes *Fgf21* and *Cyp4a10*. ATAC-seq is presented in red, H3K27ac ChIP-seq is presented in purple. Green bar indicates downstream regulatory region.
- (left) Aggregation plot for H3K27ac ChIP-seq mean tag density for cluster 1 gene promoters. (right) Bar graph quantifying mean values of H3K27ac ChIP-seq peaks found in cluster 1 gene promoters.
- Genome browser track for cluster 3 genes *Pdk4* and *Plin2*. ATAC-seq is presented in red, H3K27ac ChIP-seq is presented in purple.
- (left) Aggregation plot for H3K27ac ChIP-seq mean tag density for cluster 3 gene promoters. (right) Bar graph quantifying mean values of H3K27ac ChIP-seq peaks found in cluster 3 gene promoters.

Significance determined by Kruskal-Wallis test with Dunn's post hoc correction. \*p < 0.0001; ns, not significant. Bar graphs represent 2%-98% percentile.

305 of overall chromatin accessibility. This further demonstrates lipid-driven selective histone  
306 acetylation despite absence of mitochondrial  $\beta$ -oxidation. *Ppar $\alpha$*  is not required for this  
307 H3K27ac deposition, however *Ppar $\alpha$*  is still needed to promote chromatin accessibility and  
308 ultimately transcription of lipid catabolic genes. Comparing the WT and *Cpt2<sup>L-/-</sup>* ATAC-seq and  
309 H3K27ac ChIP-seq peaksets provides additional evidence that the *Cpt2<sup>L-/-</sup>* epigenetic program  
310 builds upon the baseline fasting chromatin architecture to exaggerate an established response.

311 Clusters 1 and 3, together comprising the genes induced in *Cpt2<sup>L-/-</sup>* liver, provided a  
312 useful contrast to understand variations in active chromatin acetylation and how they relate to  
313 *Ppar $\alpha$* . H3K27ac occupancy at Cluster 1 gene promoters paralleled ATAC-seq trends in that  
314 loss of *Ppar $\alpha$*  was associated with significantly decreased promoter H3K27ac tag density, as  
315 indicated by *Fgf21* and *Cyp4a10* (**Fig. 6c**). There was no statistical difference in H3K27ac  
316 signal between WT and *Cpt2<sup>L-/-</sup>* animals (**Fig. 6d**). At Cluster 3 gene promoters, in contrast to  
317 Cluster 1, *Ppar $\alpha$*  loss was not associated with depleted promoter H3K27ac signal. H3K27ac  
318 occupancy was instead distinctly independent of *Ppar $\alpha$* , as indicated by its canonical target  
319 genes *Pdk4* and *Plin2* (**Fig 6e**). Moreover, the *Cpt2<sup>L-/-</sup>* background is associated with  
320 significantly elevated H3K27ac promoter tag density compared to WT and *Ppar $\alpha$ <sup>-/-</sup>* animals (**Fig.**  
321 **6f**). These observations continue to demonstrate that the lipid-associated changes in chromatin  
322 accessibility are linked to site-specific epigenetic modifications in gene promoters.

323 At Cluster 1 gene *Fgf21* we noticed an acetylation pattern indicative of a regulatory  
324 region downstream from the transcription termination site (**Fig. 6c**, green bar). The H3K27ac  
325 signal at this site was comparable between the four genotypes, yet accessibility was only  
326 observed in the WT and *Cpt2<sup>L-/-</sup>* animals. Both ATAC-seq peaks contained *Ppar $\alpha$*  binding  
327 motifs. This chromatin pattern parallels that observed at cluster 3 gene promoters. We  
328 speculate that at these loci *Ppar $\alpha$*  is able to detect antecedent chromatin acetylation as part of

329 its DNA binding mechanism, or that an epigenetic reader detects that mark and subsequently  
330 loads Ppar $\alpha$  onto chromatin, thereby promoting a transcriptionally permissive state.

331

### 332 **Loss of Ppar $\alpha$ selectively alters the hepatic fasting enhancer landscape.**

333 Fasting stimulates a cascade of transcription factor loading and binding onto hepatic enhancers  
334 (Goldstein et al., 2017). Enhancers can be categorized as either poised or active. The former  
335 are indicated by the histone modification H3K4me1, and the latter are defined by co-occupancy  
336 of H3K4me1 and H3K27ac (Creyghton et al., 2010). We decided to use the Cpt2<sup>L-/-</sup> model as a  
337 handle by which to investigate lipid-responsive enhancer elements, and the extent to which  
338 Ppar $\alpha$  regulates both their poising and activation. A total of 8998 active enhancers were  
339 detected across all genotypes (**Fig. 7a, Table S6**). Strikingly, Ppar $\alpha$ -null animals had  
340 diminished chromatin accessibility over active enhancer elements (**Fig. S7a**). Loss of either  
341 Cpt2 or Ppar $\alpha$  alone did not impact H3K4me1 density at active enhancers, but their combined  
342 deletion in DKO liver reduced global enhancer priming (**Fig. 7a**). Enhancer H3K27ac signal did  
343 not differ between Ppar $\alpha$ <sup>-/-</sup> and WT animals. However, loss of hepatic Cpt2 was associated with  
344 overall decreased H3K27ac occupancy at active enhancers. This was an unanticipated contrast  
345 to increased acetylation at gene promoters under the Cpt2<sup>L-/-</sup> background (**Fig. 1g, 6a**). Overall  
346 these data imply that while loss of Ppar $\alpha$  alone does not negatively impact the enhancer  
347 epigenetic landscape during the latter stages of a fast, global enhancer accessibility is  
348 significantly hindered without the transcription factor.

349 Active enhancers were highly enriched for Hnf4 $\alpha$  and Ppar $\alpha$  binding motifs (**Fig. 7b**).  
350 Surprisingly, Ppar $\alpha$  ChIP-seq sites located within enhancers showed elevated H3K4me1 and  
351 H3K27ac signals in all knockout genotypes (**Fig. 7c**) (Sommars et al., 2019). There was no  
352 difference in enhancer H3K4me1 signal between Cpt2<sup>L-/-</sup> and Ppar $\alpha$ <sup>-/-</sup> liver, though loss of both  
353 genes in DKO animals caused significantly increased methylation near Ppar $\alpha$  binding sites.





- E. Aggregation plots for H3K4me1 and H3K27ac tag density within 1kb flanking regions of Ppar $\alpha$  ChIP peak center at enhancers with repressed H3K27ac signal in Ppar $\alpha$  liver.
  - F. H3K27ac GREAT ontology for enhancers with repressed H3K27ac signal in Ppar $\alpha$  liver.
  - G. (*top*) Pie chart showing genomic distribution of H3K4me1 and H3K27ac differential peak analysis for enhancers with increased H3K27ac signal in Cpt2<sup>L-/-</sup> liver compared to WT. (*bottom*) Percent overlap between peak genomic annotation and Ppar $\alpha$  ChIP-seq coordinates.
  - H. Heatmap of normalized H3K27ac ChIP-seq (purple), H3K4me1 ChIP-seq (green), and ATAC-seq (red) signal at active enhancers classified according to DKO/Cpt2<sup>L-/-</sup> differential peak analysis. Coverage is calculated from peak center with  $\pm 5$ kb flanking regions.
  - I. (*top*) Pie chart showing genomic distribution of H3K27ac differential peak analysis for enhancers with increased, repressed, and unchanged H3K27ac signal in DKO liver compared to Cpt2<sup>L-/-</sup>. (*bottom*) Percent overlap between peak genomic annotation and Ppar $\alpha$  ChIP-seq coordinates.
  - J. H3K27ac GREAT ontology for Class B enhancers (DKO < Cpt2<sup>L-/-</sup>).
  - K. Bar graphs quantifying normalized H3K27ac and H3K4me1 ChIP-seq signal at Class A and Class B active enhancers
- Significance determined by Kruskal-Wallis test with Dunn's post hoc correction. \*p < 0.0001; ns, not significant. Bar graphs represent 2%-98% percentile.

355 H3K27ac tag density flanking Ppar $\alpha$  binding sites was increased in Cpt2<sup>L-/-</sup> animals compared to  
356 Ppar $\alpha$ <sup>-/-</sup>. Cpt2<sup>L-/-</sup> animals also had increased ATAC-seq signal over Ppar $\alpha$  enhancer sites  
357 compared to WT animals (**Fig. S7b**). As might be expected, chromatin accessibility over Ppar $\alpha$   
358 sites was decreased in Ppar $\alpha$ -null livers, though this was despite increased enhancer priming  
359 and acetylation over WT baselines at those loci (**Fig. 7c, S7b**). This indicates that the active  
360 epigenetic state is maintained independent of Ppar $\alpha$  at these enhancers, but Ppar $\alpha$  is required  
361 to promote chromatin accessibility. Together these data show that perturbations to fatty acid  
362 catabolism are associated with amplified enhancer priming and acetylation specifically near  
363 Ppar $\alpha$  binding sites even in the absence of the transcription factor. We propose this is an  
364 epigenetic mechanism for the hepatocyte to prime a genomic response to impaired lipid  
365 catabolism.

366 We next examined the specific changes to enhancer state at loci that are differentially  
367 regulated in Ppar $\alpha$ <sup>-/-</sup> liver compared to WT. Loss of Ppar $\alpha$  was associated with targeted  
368 repression of H3K27ac signal, and to a lesser extent H3K4me1 signal (**Fig. 7d**). Only 169  
369 enhancers had suppressed priming in Ppar $\alpha$ <sup>-/-</sup> animals in contrast to the 612 enhancers with  
370 suppressed H3K27ac signal in Ppar $\alpha$ <sup>-/-</sup> animals. As expected, these downregulated regions



371 contained a high frequency of Ppar $\alpha$  ChIP-seq binding sites. Curiously, 33% of H3K27ac peaks  
372 repressed in Ppar $\alpha$ <sup>-/-</sup> liver were located within enhancer elements, while only 19% of H3K27ac  
373 signal changes were found in gene promoters (**Fig. 7d**). In other words, loss of Ppar $\alpha$   
374 diminished chromatin acetylation at a greater number of enhancers than promoters. Enhancers  
375 with blunted acetylation in Ppar $\alpha$ <sup>-/-</sup> liver displayed highly enriched H3K4me1 and H3K27ac  
376 signals in Cpt2<sup>L-/-</sup> animals (**Fig. 7e**). The Genomic Regions Enrichment of Annotations Tool  
377 (GREAT), which provides ontologies for enhancer function using a binomial test specific for  
378 long-range genomic regulatory domains, showed that enhancers repressed by loss of Ppar $\alpha$   
379 were associated with ontology terms for fatty acid metabolism (**Fig. 7f**) (McLean et al., 2010).  
380 These data are consistent with a model in which Cpt2 loss drives Ppar $\alpha$  signaling, and that  
381 Ppar $\alpha$  target gene transcription is associated with heightened activation of enhancers  
382 associated with lipid metabolism.

383         Following up on these observations, we next examined how a deficit in  $\beta$ -oxidation  
384 affected the hepatic enhancer landscape, and the extent to which Ppar $\alpha$  is implicated in  
385 genomic maintenance under these metabolic conditions. Loss of Cpt2 had minimal effects on  
386 overall enhancer priming (**Fig. 7g**). In contrast, Cpt2<sup>L-/-</sup> mice had 915 enhancer regions with  
387 increased H3K27ac signal. 55% of these regions contain Ppar $\alpha$  binding sites. Indeed, Cpt2<sup>L-/-</sup>  
388 animals had a prominent increase in both enhancer priming and acetylation over Ppar $\alpha$  ChIP  
389 sites (**Fig. S7c**). At these Cpt2<sup>L-/-</sup>-sensitive loci we also observed increased H3K4me1 and  
390 H3K27ac ChIP signals over Ppar $\alpha$  binding sites in Ppar $\alpha$ -null animals compared to WT controls,  
391 indicating that enhancers with epigenetic sensitivity to impaired  $\beta$ -oxidation likewise respond to  
392 impaired Ppar $\alpha$  signaling, perhaps designating a response to drive augmented transcription  
393 such as we see in the Cpt2<sup>L-/-</sup> mice (**Fig. S7c**).

394         The DKO mice clarify the role for Ppar $\alpha$  at these enhancer elements. These mice had a  
395 striking change to their active enhancer landscape when compared to their Cpt2<sup>L-/-</sup> counterparts.

396 We initially noticed there were far fewer changes in enhancer priming compared to changes in  
397 enhancer acetylation (**Fig. 7i, S7d**). A total of 1487 differentially regulated enhancers were  
398 detected between the two genotypes, which were broken down into three groups according to  
399 differential H3K27ac ChIP signal (**Fig. 7h**). Class B enhancers (n=876) were defined by  
400 statistically significant H3K27ac depletion in DKO mice compared to  $Cpt2^{L-/-}$  (**Fig. 7h, 7k**). We  
401 consider these to be the enhancer elements at which the ligand-activated  $Ppar\alpha$  signaling  
402 program specifically impacts acetylation in response to lipid sensing. The high incidence of  
403  $Ppar\alpha$  binding sites within these enhancers suggests that  $Ppar\alpha$  itself plays a direct role in local  
404 H3K27ac deposition (**Fig. 7i**).  $Cpt2^{L-/-}$  animals had increased H3K27ac signal at these regions  
405 compared to WT (**Fig. 7k**). We further noted that loss of  $Ppar\alpha$  on the  $Cpt2^{L-/-}$  background had  
406 an outsized effect on enhancer acetylation compared to promoter acetylation (**Fig. 7i**). Finally,  
407 GREAT analysis indicates that proximal genes for Class B enhancers were associated with  
408 multiple lipid gene ontology terms (**Fig. 7j**). Together these data demonstrate the substantial  
409 role for enhancer elements in the  $Ppar\alpha$  transcriptional response, and that lipid-amplified  $Ppar\alpha$   
410 signaling is perhaps mediated more substantially by epigenetic changes to enhancer regions  
411 than at promoters.

412 Class A enhancers (n=611) were defined by a greater than two-fold increase in H3K27ac  
413 signal in DKO mice compared to  $Cpt2^{L-/-}$  liver. DKO Class A enhancer acetylation was similarly  
414 increased over WT animals (**Fig. 7k**). This augmented H3K27ac signal was shared by  $Ppar\alpha^{-/-}$   
415 animals. Likewise, both  $Ppar\alpha^{-/-}$  and DKO animals displayed elevated H3K4me1 priming levels  
416 at Class A enhancers (**Fig. 7k**). This implies  $Ppar\alpha$  loss is associated with enhancer activation  
417 that may be linked to other metabolic processes. Class C enhancers (n=7511), which showed  
418 no change in acetylation state between  $Cpt2^{L-/-}$  and DKO animals, represent 83% of the active  
419 enhancer landscape (**Fig. S7e**), emphasizing that the genomic perturbations presented by loss  
420 of  $Cpt2$  or  $Ppar\alpha$  result in specific, targeted changes to enhancer epigenetic state.

421           Altogether these data demonstrate that metabolic perturbations such as inhibiting  
422 hepatic fatty acid oxidation or loss of Ppar $\alpha$  result in higher levels of enhancer priming and  
423 acetylation proximal to Ppar $\alpha$  sites that are largely associated with lipid metabolism. Ppar $\alpha$   
424 DNA binding is preceded by enhancer priming and acetylation. This is clearly illustrated at  
425 Ppar $\alpha$ -bound enhancers found near *Fgf21* and *Pdk4* (**Fig. S7f**). The acetylation may even be  
426 the signal for Ppar $\alpha$  to engage these regulatory elements. Furthermore, while changes to  
427 enhancer epigenetic state are more localized near Ppar $\alpha$  binding sites, the transcription factor is  
428 so crucial to maintaining permissive chromatin that loss of Ppar $\alpha$  repressed chromatin  
429 accessibility across the global enhancer network. We also surmise that changes to the  
430 enhancer landscape comprise a significant component of ligand-activated Ppar $\alpha$  signaling, with  
431 quantitatively more Ppar $\alpha$ -associated changes in acetylation occurring at enhancers compared  
432 to promoters. Overall, these data show the requirement for Ppar $\alpha$  activation in maintaining  
433 transcriptionally permissive hepatic genomic architecture, particularly when the hepatocyte must  
434 sense and respond to elevated lipid.

435

## 436 **DISCUSSION**

437 A foundational question in liver metabolism is how the hepatocyte senses and responds to  
438 fluctuations in lipid availability. This ultimately requires tight coordination between the  
439 hepatocyte's metabolic state, genome architecture, and transcriptional output. Fasting *Cpt2*<sup>L-/-</sup>  
440 mice prompts accumulation of fatty acids, including putative endogenous Ppar $\alpha$  ligands (Lee et  
441 al., 2016; Selen et al., 2021). Using this mouse genetic model and a combination of next-  
442 generation sequencing platforms we clarify the role for hepatic lipid content in metabolic gene  
443 transcription, and in particular how Ppar $\alpha$ , activated by natural ligands, maintains the  
444 transcriptional architecture necessary for target gene expression (**Fig. 8**).

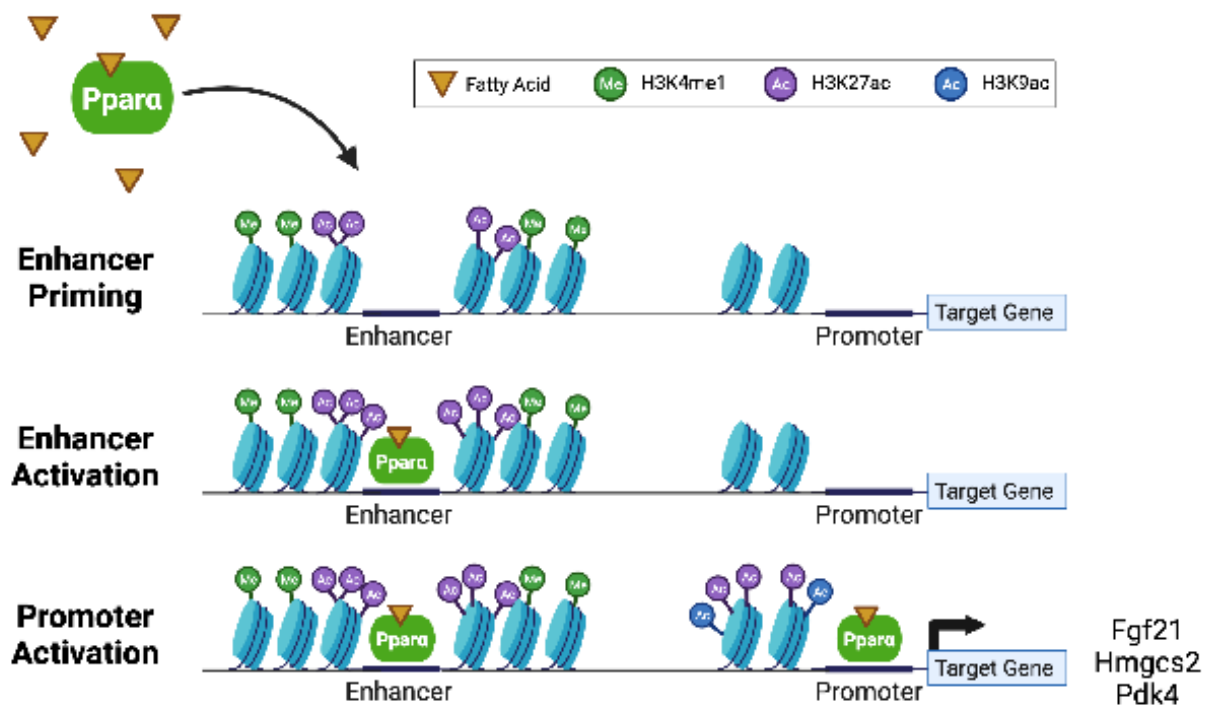

**Fig 8. Ppara is required for lipid-responsive enhancer and promoter activation**

Deficit in mitochondrial  $\beta$ -oxidation and/or excess fatty acids prompts H3K4me1 and H3K27ac deposition at lipid-responsive enhancer elements. This signals ligand-activated Ppara recruitment, and subsequent enhancer accessibility and activity. Ppara then binds to target gene promoters to drive chromatin acetylation, thereby inducing transcription of fatty acid catabolic genes to alleviate heightened lipid burden.

446 Our system benefits from use of *in vivo* metabolic perturbations to assess the role for  
447 excess fatty acids in driving transcription. It has been stipulated that fatty acid oxidation  
448 promotes transcription of metabolic genes via bulk increase to histone acetylation by lipid-  
449 derived acetyl-CoA (McDonnell et al., 2016). Our data instead reveal that changes in hepatic  
450 lipid levels can induce metabolic gene transcription even when mitochondrial  $\beta$ -oxidation, and  
451 subsequent acetyl-CoA production, is inhibited. Indeed we detected no changes in bulk histone  
452 acetylation in *Cpt2*<sup>L-/-</sup> liver. We instead observed that promoter acetylation patterns for many  
453 lipid catabolic genes are Ppar $\alpha$ -dependent. Enhancers displayed Ppar $\alpha$ -independent  
454 acetylation proximal to Ppar $\alpha$  binding sites, but enhancer chromatin remained inaccessible in  
455 the absence of the transcription factor. This indicates that fatty acid-induced transcription is  
456 stimulated not by epigenetic changes, but instead by ligand-induced Ppar $\alpha$  activation and the  
457 associated chromatin remodeling. Studies in mice given a high fat diet (HFD) provide  
458 supplemental evidence for our observations on fatty acid-driven transcription. In parallel with  
459 our results, HFD-fed mice show increased hepatic lipid content as well as Ppar $\alpha$ -dependent  
460 hepatic gene expression (Patsouris et al., 2006). HFD-fed mice likewise exhibit suppressed  
461 liver acetyl-CoA content but no difference in bulk histone acetylation compared to chow-fed  
462 controls (Carrer et al., 2017).

463 A common method to stimulate Ppar $\alpha$  and define target genes is to use a  
464 pharmacological agonist (Brocker et al., 2020; Janssen et al., 2015; Lee et al., 1995;  
465 Rakhshandehroo et al., 2007). Here we instead use fasting-induced buildup of endogenous  
466 ligand to activate Ppar $\alpha$ . We observed two distinct patterns of target gene transcription. In the  
467 first group (Cluster 1), target genes require Ppar $\alpha$  for promoter accessibility and acetylation  
468 under conditions of high lipid availability. In the second group (Cluster 3), target genes do not  
469 require Ppar $\alpha$  for promoter acetylation. Promoter accessibility for the latter cluster is maintained  
470 in Ppar $\alpha$ <sup>-/-</sup> animals, though to a lesser extent than measured in WT controls. We therefore

471 hypothesize that a secondary mechanism maintains transcriptionally permissive H3K27ac  
472 occupancy at these loci independent of Ppar $\alpha$ , thereby promoting baseline gene expression.  
473 The additional requirement of Ppar $\alpha$  for gene induction above baseline is reflected in both the  
474 RNA-seq and ATAC-seq datasets.

475 Cluster 3 gene promoters are enriched for the Hnf4 $\alpha$  binding motif, suggesting the nuclear  
476 hormone receptor may be involved in Ppar $\alpha$ -independent promoter acetylation. It should be  
477 noted that Hnf4 $\alpha$  can bind directly to promoter sequences of *Fgf21*, *Hmgcs2*, and *Cpt1* to  
478 obstruct Ppar $\alpha$  binding and gene transcription (Martinez-Jimenez et al., 2010). However, these  
479 three genes were assigned to Cluster 1, leaving open the possibility of Hnf4 $\alpha$  involvement in  
480 Cluster 3 promoter activation. Hnf4 $\alpha$  is highly expressed in the three knockout genotypes,  
481 providing additional evidence for this suggestion. We similarly observe high incidence of Hnf4 $\alpha$   
482 motifs at active enhancers, in line with previous work demonstrating that Hnf4 $\alpha$  maintains  
483 H3K27ac occupancy at active enhancers in mouse liver (Thakur et al., 2019).

484 Previous *in vivo* work has advanced a role for Ppar $\alpha$  localization to hepatic enhancers.  
485 In a model of diet induced obesity, Ppar $\alpha$ -null mice had suppressed circadian transcription for  
486 eRNA proximal to Ppar $\alpha$  binding motifs (Guan et al., 2018). In another study, hepatic fed state  
487 Ppar $\alpha$  ChIP-seq binding sites were observed to overlap with fasting-induced enhancers  
488 (Goldstein et al., 2017). Our research builds upon those observations by demonstrating that  
489 Ppar $\alpha$ -sensitive enhancer elements in fasting liver are associated with lipid signaling. Elevated  
490 enhancer accessibility in *Cpt2*<sup>L-/-</sup> animals, including particularly high ATAC-seq signal over  
491 Ppar $\alpha$  binding sites, further indicates that lipids drive Ppar $\alpha$  engagement with active chromatin.  
492 Moreover, depleted chromatin accessibility over all active enhancers in Ppar $\alpha$ -null animals  
493 indicates the requirement of Ppar $\alpha$  to properly maintain the hepatic fasting enhancer landscape.

494 It's notable that Ppar $\alpha$  loss does not significantly impact global enhancer epigenetic  
495 state. Indeed, enhancer priming proximal to Ppar $\alpha$  binding sites is independent of Ppar $\alpha$  itself.

496 Increased H3K4me1 signal in DKO animals compared to other genotypes likely indicates a  
497 compensatory signal to engage lipid-sensitive enhancers in response to the hepatocyte's need  
498 for oxidative clearance of excess fatty acid. Enhancer H3K27ac signal adjacent to Ppar $\alpha$   
499 binding sites is likewise globally independent of Ppar $\alpha$ . Both Cpt2<sup>L/-</sup> and DKO animals display  
500 the highest levels of enhancer acetylation near Ppar $\alpha$  binding sites, and yet these two  
501 genotypes also display the lowest global enhancer H3K27ac signal. In other words, the Cpt2<sup>L/-</sup>  
502 background drives enhancer acetylation specifically in proximity to Ppar $\alpha$  binding sites,  
503 providing evidence for a mechanism in which high lipid levels prompt H3K4me1 and H3K27ac  
504 deposition to prime Ppar $\alpha$ -sensitive enhancers, and credibly acting as a signal for Ppar $\alpha$  DNA  
505 binding.

506 While overall enhancer maintenance near Ppar $\alpha$  binding sites is independent of Ppar $\alpha$ ,  
507 insight into the Ppar $\alpha$  enhancer program is gained by examining differential comparisons  
508 between genotypes. One striking observation was that Ppar $\alpha$ -associated H3K27ac signal  
509 changes occurred more frequently in enhancer elements compared to promoters. Cpt2<sup>L/-</sup>-  
510 associated lipid prompts an H3K27ac ChIP-seq signal increase at 5.5x more enhancers than  
511 promoters. Similarly, loss of Ppar $\alpha$  in Class B enhancers (DKO < Cpt2<sup>L/-</sup>) is associated with  
512 H3K27ac signal depletion at 3.7x more enhancers than promoters. Finally, Ppar $\alpha$ <sup>-/-</sup> animals  
513 show H3K27ac depletion at 1.7x more enhancers than promoters. This notable degree of signal  
514 change at enhancer regions, combined with the high incidence of Ppar $\alpha$  binding sites and  
515 association with GREAT lipid metabolism ontology terms, suggests that Ppar $\alpha$  effects more  
516 transcriptionally influential changes to chromatin architecture at enhancers over promoters. We  
517 believe this indicates that the mechanism for adjusting Ppar $\alpha$  target gene transcription levels is  
518 more closely linked to enhancer remodeling than to promoter dynamics.

519 These expanded insights into Ppar $\alpha$  gene regulation provide evidence for discrete  
520 modes by which the liver signals its transcriptional needs in the face of metabolic perturbations



521 linked to fluctuations in lipid availability. We demonstrate distinct types of Ppar $\alpha$  signaling  
522 based on patterns of chromatin state and transcriptional output, show the role for Ppar $\alpha$  in  
523 hepatic enhancer maintenance, and further suggest secondary mechanisms which aid and  
524 potentially even modulate Ppar $\alpha$  signaling. These data prompt questions as to what role Ppar $\alpha$   
525 may play in regulating the transcriptional landscape associated with lipid sensing in other  
526 tissues, such as the kidney and adipose. This study thus uncovers new avenues of  
527 investigation into lipid sensing at the levels of locus-specificity, tissue-specificity, and broader  
528 metabolic physiology.

529

## 530 **MATERIALS & METHODS**

### 531 **Animals**

532 All procedures were performed in accordance with the NIH's Guide for the Care and Use of  
533 Laboratory Animals and under the approval of the Johns Hopkins School of Medicine Animal  
534 Care and Use Committee.

535

536 Cpt2<sup>fl/fl</sup> and Albumin-Cre;Cpt2<sup>fl/fl</sup> (Cpt2<sup>L-/-</sup>) mice were previously described (Lee et al., 2015,  
537 2016). Cpt2<sup>fl/fl</sup>;Ppar $\alpha$ <sup>-/-</sup> and Cpt2<sup>L-/-</sup>;Ppar $\alpha$ <sup>-/-</sup> animals were generated by initially crossing Cpt2<sup>fl/fl</sup> or  
538 Cpt2<sup>L-/-</sup> animals with Ppar $\alpha$ <sup>-/-</sup> mice (Jackson Laboratories; stock no. 008154). Mice for  
539 experiments were bred from either Cpt2<sup>fl/fl</sup> crossed to Cpt2<sup>L-/-</sup> animals or Cpt2<sup>fl/fl</sup>;Ppar $\alpha$ <sup>-/-</sup> crossed  
540 to Cpt2<sup>L-/-</sup>;Ppar $\alpha$ <sup>-/-</sup> animals. All mice were housed in a facility with ventilated racks on a 14h  
541 light/10h dark cycle with *ad libitum* access to a standard rodent chow (2018SX Teklad Global,  
542 18% protein). For fasting experiments, 9 week old male mice were deprived of food for 24 hours  
543 (3p.m.-3 p.m). Tissues and serum were collected and flash-frozen at time of harvest.

544

### 545 **Immunoblotting**

546 Flash-frozen liver tissue was homogenized in RIPA buffer (50 mM Tris-HCl at pH 7.4, 150 mM  
547 NaCl, 1 mM EDTA, 1% Triton X-100, and 0.25% deoxycholate) with PhosSTOP phosphatase  
548 Inhibitor (Roche) and protease inhibitor cocktail (Roche). Homogenates were rotated for 30  
549 minutes at 4°C and then centrifuged at 18,000g for 15 minutes. Total protein concentrations  
550 were quantified by BCA assay (Thermo Fisher Scientific).

551  
552 Protein lysates (30ug input) were separated by Tris-glycine SDS-PAGE (10-12% polyacrylamide  
553 gels), followed by a transfer to PVDF membranes (Immobilon). Membranes were blocked with  
554 5% nonfat milk in TBST for 1 hour and incubated overnight at 4°C with primary antibodies at  
555 1:1000 in 3% BSA in TBST: Acetylated-Lysine, 9441, Cell Signaling Technologies; Histone H3,  
556 4499, Cell Signaling Technology, Acetyl-Histone H3 Lys9, 9649, Cell Signaling Technologies;  
557 Acetyl-Histone H3 Lys14, 7627, Cell Signaling Technologies; HSC70, 7298, Santa Cruz  
558 Biotechnology. HRP-conjugated anti-rabbit (Cytiva, NA934V) or fluorescence-based (Cy3-  
559 conjugated anti-mouse or Cy5-conjugated anti-rabbit; Invitrogen, Thermo Fisher Scientific)  
560 secondaries were used at 1:1000. Blots were imaged using the Amersham Prime enhanced  
561 chemiluminescent substrate (Cytiva) or epifluorescence on an Alpha Innotech Multimage III  
562 instrument.

563  
564 Histones were acid precipitated as previously described using an overnight 0.4N H<sub>2</sub>SO<sub>4</sub>  
565 incubation and 1 hour TCA precipitation (Shechter et al., 2007). Histones were visualized per  
566 above using 15ug protein input on an 8% polyacrylamide gel.

567

### 568 **Mass Spectrometry & Proteomic Analysis**

569 Flash-liver tissue was submitted to the Johns Hopkins Center for Proteomics Core for total  
570 proteome and acetyl-proteome analysis. Samples were prepared in lysis buffer with 8M urea  
571 and 50mM tetraethyl ammoniumbicarbonate. Lysates were treated with LysC and trypsin, then

572 labeled with 10-plex TMT. Peptide fractionation was done using basic pH reverse phase liquid  
573 chromatography, resulting in 24 fractions. Fractions were analyzed using an Orbitrap Fusion  
574 Lumos (Thermo Scientific) on an Easy nLC 1200 (Thermo Scientific) using MS1 resolution =  
575 120,000 and MS2 resolution = 30,000, HCD fragmentation method, and MS2 collision energy =  
576 35. Each fraction received a two hour run time.

577  
578 Total proteome analysis was done in Perseus (version 1.6.0.0) (Cox and Mann, 2012). p-value  
579 was calculated by Student's t-test. q-value was calculated by significance analysis of  
580 microarrays (SAM) and permutation based false discovery rate (FDR), with SAM S0 value = 0.1  
581 (Tusher et al., 2001).

582  
583 Acetyl-proteome was analyzed with Proteome Discoverer 2.1 (Thermo Scientific) using RefSeq  
584 version 78. The following parameters were used: cleavage enzyme was set as trypsin, no more  
585 than five missed cleavages were allowed, fixed modification was carbamidomethyl on cysteine  
586 residue, dynamic modifications were acetyl group on protein N-terminus or oxidation on  
587 methionine and acetyl-lysine, and MS2 level quantification. A 1% FDR was applied for both  
588 peptide and protein levels. Acetyl-proteome data were normalized to median of total proteome  
589 to remove systemic deviation.

590  
591 The COMPARTMENT dataset was used to assign localization for peptides for all cell  
592 compartments except mitochondria (Binder et al., 2014). Only COMPARTMENTS annotations  
593 with a minimum confidence score of 3 were used. Mitochondrial peptides were assigned using  
594 the MitoCarta 2.0 (Calvo et al., 2016).

595

596 **Tissue acetyl-CoA**

597 Flash-frozen liver tissue was submitted to the Mouse Metabolic Phenotyping Center at Case  
598 Western Reserve University for acetyl-CoA measurements via liquid chromatography-mass  
599 spectrometry.

600

#### 601 **Serum metabolites**

602 Blood glucose levels in fasted mice were measured at time of harvest using a Nova Max Plus  
603 glucometer.

604

605 Untargeted metabolomics on serum was performed by Metabolon Inc (n=6). For analysis raw  
606 area counts for each biochemical species were rescaled to set the median equal to 1. Heatmap  
607 and PCA were generated by MetaboAnalyst (Chong et al., 2019). Differentially regulated  
608 metabolites for heatmap were determined using a 1-way ANOVA with Fisher's LSD.

609

#### 610 **RNA-sequencing library preparation**

611 Total RNA was isolated from flash-frozen liver tissue was using TRIzol reagent (Invitrogen,  
612 Thermo Fisher Scientific), followed by addition purification using RNeasy Mini Kit (QIAGEN), per  
613 manufacturer recommendations. RNA quality was assessed by Nanodrop.

614

615 RNA was then submitted to Novogene Corporation Inc (China & Davis, CA, USA) for library  
616 construction and sequencing. Four biological replicates were used for each genotype. Reads  
617 were aligned to mouse reference genome (mm10) using STAR software (Dobin et al., 2013).  
618 Investigators performed analyses downstream of read count acquisition.

619

#### 620 **RNA-seq Analysis**

621 Differential expression was performed on raw read counts in R with DESeq2 (v3.12) using the  
622 Wald test with betaPrior=FALSE and lfcShrink type="apeglm" (Love et al., 2014; Zhu et al.,

623 2019). Differential expression cutoff was fold change  $\geq |2|$ ,  $p_{adj} < 0.05$ . Normalized read counts  
624 were visualized in GraphPad Prism. PCA plot was generated using pcaExplorer package (Marini  
625 and Binder, 2019). WY14643-responsive genes were determined from GSE140063 using the  
626 same differential expression pipeline (Naiman et al., 2019).

627  
628 K-means clustering of differentially expressed transcripts was performed in R on  $rlog$   
629 transformed count values from DESeq2 output. Optimal cluster number ( $n=5$ ) was determined  
630 by gap statistic (factoextra package). K-means clustering was performed and visualized in the  
631 pheatmap package with Z-score row scaling  $[(x - \bar{x})/\sigma]$ . Tracing diagrams were generated using  
632 the ggplot2 package (Wickham, 2016). Gene ontology and KEGG pathway enrichment was  
633 obtained using the DAVID web application (Huang et al., 2007).

634

### 635 **ATAC-seq and ChIP-seq library preparation**

636 ATAC-seq and ChIP-seq were performed using Active Motif sequencing services (Carlsbad,  
637 CA). Flash-frozen liver tissue was submitted to Active Motif, with two biological replicates per  
638 genotype for H3K4me1 and H3K27ac ChIP-seq, and ATAC-seq. One biological replicate was  
639 submitted for H3K9ac ChIP-seq. Library construction was performed according to company  
640 protocol. The following antibodies were used for ChIP-seq: H3K4me1 (Active Motif #39297),  
641 H3K9ac (Active Motif #39917), H3K27ac (Active Motif #39133).

642

### 643 **ATAC-Seq & ChIP-seq Analysis**

644 Sequence acquisition, mapping, raw BAM file generation, and peak calling was performed by  
645 Active Motif. For ATAC-seq, paired-end 42nt sequencing reads generated by Illumina NexSeq  
646 500 were mapped to mm10 reference genome using the BWA algorithm with default settings (Li  
647 and Durbin, 2009). For ChIP-seq, single-end 75nt sequencing reads generated by Illumina  
648 NexSeq 500 were mapped to mm10 reference genome using the BWA algorithm with

649 “bwaln/samse” default settings. For normalization, tag number of all samples within a  
650 comparison group was reduced by random down-sampling to the number of tags present in the  
651 smallest sample. Peak calling was performed using MACS2 with default cutoff values (Zhang et  
652 al., 2008); ATAC-seq paired reads were treated as independent events. ENCODE blacklist  
653 regions were removed (Amemiya et al., 2019). bigWig files for visualization on UCSC Genome  
654 Browser were created using a 32nt bin with a 200bp *in silico* tag extension (Kent et al., 2002).  
655 Investigators performed downstream analysis.

656  
657 Raw BAM files were processed using samtools and bamtools to remove reads with mapq score  
658 < 25, unmapped reads, mitochondrial reads, and reads with more than 2 mismatches (Barnett  
659 et al., 2011; Li et al., 2009). Aggregation plots and motif analysis were generated  
660 using Hypergeometric Optimization of Motif EnRichment (HOMER) (Heinz et al., 2010). Motif  
661 analysis was calculated using ‘findMotifsGenome.pl’ with -size 500 on BED file input with that  
662 assumption that a broad scanning window is preferred for histone mark motif analysis.  
663 knownResults motif output are reported in this study. Tag directories for histograms were  
664 generated from BAM files using ‘makeTagDirectory.pl’ with -fragLength 200 and -tbp 1. Tag  
665 directories combined both biological replicates per genotype. Aggregation plots were produced  
666 using ‘annotatePeaks.pl’ with -hist 10 and normalization set to the lowest sample tag count  
667 within a comparison group. Plots and corresponding bar charts, reported as tags per bp per  
668 peak, were visualized in GraphPad Prism 9.

669  
670 Diffbind (v3.13) was used to generate a RangedSummarizedExperiment from BAM and  
671 narrowPeak files with the following parameters: fragmentLength=200,  
672 score=DBA\_SCORE\_READS, summits=TRUE, bUseSummarizeOverlaps=FALSE,  
673 bRemoveDuplicates=TRUE, and minOverlap=2 (Ross-Innes et al., 2012; Stark and Brown,  
674 2011). mm10 ENCODE blacklist regions were removed by calling dba.blacklist(). Default

675 normalization with full library size was called with `dba.normalize()`. ATAC-seq normalization  
676 included `background=TRUE` due to large changes between genotypes.  
677 `RangedSummarizedExperiment` was passed to `DESeq2` for differential peak analysis using  
678 `betaPrior=TRUE`. Significance cutoff for differential peak analysis was considered fold change  $\geq$   
679  $|2|$ , `padj < 0.05`. ATAC-seq MA plots were generated in `Diffbind`. PCA plots were generated  
680 using `pcaExplorer` on `DESeq2` rlog transformed read counts.

681

## 682 **Enhancer Analysis**

683 All genome arithmetic to compare peak coordinates was done using `bedtools` (Quinlan, 2014;  
684 Quinlan and Hall, 2010). This study only focused on active enhancer elements that were  
685 detected in one or more genotypes; regions enriched for H3K4me1 alone were excluded. Active  
686 enhancers were defined as a region with H3K4me1 and H3K27ac co-occupancy excluding  
687 intervals located within 2kb of a transcription start site or termination site (Calo and Wysocka,  
688 2013; Creighton et al., 2010). Chromatin accessibility was not used to define active enhancers  
689 due to the severe global depletion in ATAC-seq tag density observed in `Ppar $\alpha$` -null animals.  
690 Gene coordinates were obtained from the UCSC Table Browser `refGene` (2020-08-17 update)  
691 (Karolchik et al., 2004). H3K4me1 and H3K27ac overlap was determined with a minimum 50%  
692 H3K27ac interval overlap over an H3K4me1 peak due to account for differences in histone mark  
693 average peak length. Fasting liver `Ppar $\alpha$`  ChIP-seq coordinates were obtained from GSE118788  
694 (Supplementary File `Ppar $\alpha$ -C57-Fast-peaks`) (Sommars et al., 2019).

695

696 Differential enhancer groups were defined using the H3K27ac ChIP-seq `DESeq2` output from  
697 above with the significance cutoff set at fold change  $\geq |2|$ , `padj < 0.05`. `DESeq2` normalized  
698 values were used for enhancer tag counts. Enhancer heatmaps were generated from `bigWig`  
699 files using `deepTools 2.0` with `'computeMatrix'` reference-point mode and `'plotHeatmap'`  
700 (Ramírez et al., 2016).



701

702 Enhancer ontology was determined with the Genomic Regions Enrichment of Annotations Tool  
703 (GREAT) (McLean et al., 2010). GREAT version 4.0.4 was used in “basal plus extension” mode  
704 with default parameters and a 500kb maximum extension. Curated regulatory domains were  
705 included in calculations.

706

### 707 **Statistical Analysis**

708 All statistical comparisons were carried out in GraphPad Prism 9 unless otherwise noted.  
709 Significance was determined using Student’s t-test, 1-way ANOVA with Tukey’s post hoc  
710 correction, or Kruskal-Wallis test with Dunn’s post hoc correction as noted. Shapiro-Wilk test for  
711 normality was used in R to determine whether to use a parametric or non-parametric test for  
712 significance for genomic data.

713

### 714 **DATA AND SOFTWARE AVAILABILITY**

715 RNA-seq data were deposited in GSE165701. ChIP-seq and ATAC-seq data were deposited in  
716 GEO SuperSeries GSE179053. Scripts used for RNA-seq, ChIP-seq, and ATAC-seq analysis  
717 can be found at [https://github.com/WolfgangLabJHMI/cpt2\\_ppara\\_liver\\_seq](https://github.com/WolfgangLabJHMI/cpt2_ppara_liver_seq). The mass  
718 spectrometry proteomics data have been deposited to the ProteomeXchange Consortium via  
719 the PRIDE partner repository with the dataset identifier PXD027235.

720

### 721 **ACKNOWLEDGEMENTS**

722 This work was supported in part by a National Institutes of Health grant R01DK120530 and  
723 R01DK116746 to M.J.W.

724

725 We thank Dr. Caitlyn Bowman-Cornelius for initial mouse breeding, Dr. Ebru Selen for advice on  
726 metabolomics analysis, and Dr. Anastasia Kralli for helpful conversations. We also thank Dr.

727 Chan-Hyun Na and the Johns Hopkins Center for Proteomics Discovery for proteomic data  
728 acquisition.

729

### 730 **AUTHOR CONTRIBUTIONS**

731 M.J.W and K.S.C conceptualized the project. K.S.C collected and analyzed data. K.S.C and  
732 M.J.W participated in the writing, review, and editing of the manuscript.

733

### 734 **REFERENCES**

735 Amemiya, H.M., Kundaje, A., and Boyle, A.P. (2019). The ENCODE Blacklist: Identification of  
736 Problematic Regions of the Genome. *Scientific Reports* 9, 1–5.

737 Andersson, R., and Sandelin, A. (2020). Determinants of enhancer and promoter activities of  
738 regulatory elements. *Nature Reviews Genetics* 21, 71–87.

739 Aoyama, T., Peters, J.M., Iritani, N., Nakajima, T., Furihata, K., Hashimoto, T., and Gonzalez,  
740 F.J. (1998). Altered constitutive expression of fatty acid-metabolizing enzymes in mice  
741 lacking the peroxisome proliferator-activated receptor  $\alpha$  (PPAR $\alpha$ ). *Journal of Biological*  
742 *Chemistry* 273, 5678–5684.

743 Asrani, S.K., Devarbhavi, H., Eaton, J., and Kamath, P.S. (2019). Burden of liver diseases in the  
744 world. *Journal of Hepatology* 70, 151–171.

745 Bardot, O., Aldridge, T.C., Latruffe, N., and Green, S. (1993). PPAR-RXR heterodimer activates  
746 a peroxisome proliferator response element upstream of the bifunctional enzyme gene.  
747 *Biochemical and Biophysical Research Communications* 192, 37–45.

748 Barnett, D.W., Garrison, E.K., Quinlan, A.R., Strömberg, M.P., and Marth, G.T. (2011). Bamtools:  
749 A C++ API and toolkit for analyzing and managing BAM files. *Bioinformatics* 27, 1691–  
750 1692.

751 Binder, J.X., Pletscher-Frankild, S., Tsafou, K., Stolte, C., O'Donoghue, S.I., Schneider, R., and  
752 Jensen, L.J. (2014). COMPARTMENTS: Unification and visualization of protein subcellular  
753 localization evidence. *Database* 2014, bau012–bau012.

754 Boergesen, M., Pedersen, T.A., Gross, B., van Heeringen, S.J., Hagenbeek, D., Bindsboll, C.,  
755 Caron, S., Lalloyer, F., Steffensen, K.R., Nebb, H.I., et al. (2012). Genome-Wide Profiling of  
756 Liver X Receptor, Retinoid X Receptor, and Peroxisome Proliferator-Activated Receptor in  
757 Mouse Liver Reveals Extensive Sharing of Binding Sites. *Molecular and Cellular Biology*

- 758 32, 852–867.
- 759 Bowman, C.E., Selen Alpergin, E.S., Cavagnini, K., Smith, D.M., Scafidi, S., and Wolfgang, M.J.  
760 (2019). Maternal Lipid Metabolism Directs Fetal Liver Programming following Nutrient  
761 Stress. *Cell Reports* 29.
- 762 Brocker, C.N., Kim, D., Melia, T., Karri, K., Velenosi, T.J., Takahashi, S., Aibara, D., Bonzo,  
763 J.A., Levi, M., Waxman, D.J., et al. (2020). Long non-coding RNA Gm15441 attenuates  
764 hepatic inflammasome activation in response to PPARA agonism and fasting. *Nature*  
765 *Communications* 11.
- 766 Calo, E., and Wysocka, J. (2013). Modification of Enhancer Chromatin: What, How, and Why?  
767 *Molecular Cell* 49, 825–837.
- 768 Calvo, S.E., Clauser, K.R., and Mootha, V.K. (2016). MitoCarta2.0: An updated inventory of  
769 mammalian mitochondrial proteins. *Nucleic Acids Research* 44, D1251–D1257.
- 770 Carrer, A., Parris, J.L.D., Trefely, S., Henry, R.A., Montgomery, D.C., Torres, A., Viola, J.M.,  
771 Kuo, Y.M., Blair, I.A., Meier, J.L., et al. (2017). Impact of a high-fat diet on tissue Acyl-CoA  
772 and histone acetylation levels. *Journal of Biological Chemistry* 292, 3312–3322.
- 773 Chong, J., Wishart, D.S., and Xia, J. (2019). Using MetaboAnalyst 4.0 for Comprehensive and  
774 Integrative Metabolomics Data Analysis. *Current Protocols in Bioinformatics* 68, e86.
- 775 Cox, J., and Mann, M. (2012). 1D and 2D annotation enrichment: a statistical method integrating  
776 quantitative proteomics with complementary high-throughput data. *BMC Bioinformatics* 13  
777 *Suppl* 16, 1–11.
- 778 Creighton, M.P., Cheng, A.W., Welstead, G.G., Kooistra, T., Carey, B.W., Steine, E.J., Hanna,  
779 J., Lodato, M.A., Frampton, G.M., Sharp, P.A., et al. (2010). Histone H3K27ac separates  
780 active from poised enhancers and predicts developmental state. *Proceedings of the*  
781 *National Academy of Sciences of the United States of America* 107, 21931–21936.
- 782 Dobin, A., Davis, C.A., Schlesinger, F., Drenkow, J., Zaleski, C., Jha, S., Batut, P., Chaisson,  
783 M., and Gingeras, T.R. (2013). STAR: Ultrafast universal RNA-seq aligner. *Bioinformatics*  
784 29, 15–21.
- 785 Evans, R.M., and Mangelsdorf, D.J. (2014). Nuclear receptors, RXR, and the big bang. *Cell*  
786 157, 255–266.
- 787 Francque, S., Verrijken, A., Caron, S., Prawitt, J., Paumelle, R., Derudas, B., Lefebvre, P.,  
788 Taskinen, M.R., Van Hul, W., Mertens, I., et al. (2015). PPAR $\alpha$  gene expression correlates  
789 with severity and histological treatment response in patients with non-alcoholic  
790 steatohepatitis. *Journal of Hepatology* 63, 164–173.
- 791 Gearing, K.L., Gottlicher, M., Teboul, M., Widmark, E., and Gustafsson, J.A. (1993). Interaction

- 792 of the peroxisome-proliferator-activated receptor and retinoid X receptor. Proceedings of  
793 the National Academy of Sciences of the United States of America *90*, 1440–1444.
- 794 George, F.C. (2006). Fuel metabolism in starvation. *Annual Review of Nutrition* *26*, 1–22.
- 795 Goldstein, I., and Hager, G.L. (2015). Transcriptional and Chromatin Regulation during Fasting -  
796 The Genomic Era. *Trends in Endocrinology and Metabolism* *26*, 699–710.
- 797 Goldstein, I., Baek, S., Presman, Di.M., Paakinaho, V., Swinstead, E.E., and Hager, G.L.  
798 (2017). Transcription factor assisted loading and enhancer dynamics dictate the hepatic  
799 fasting response. *Genome Research* *27*, 427–439.
- 800 Gong, Z., Tas, E., Yakar, S., and Muzumdar, R. (2017). Hepatic lipid metabolism and non-  
801 alcoholic fatty liver disease in aging. *Molecular and Cellular Endocrinology* *455*, 115–130.
- 802 Greenberg, A.S., Coleman, R.A., Kraemer, F.B., McManaman, J.L., Obin, M.S., Puri, V., Yan,  
803 Q.W., Miyoshi, H., and Mashek, D.G. (2011). The role of lipid droplets in metabolic disease  
804 in rodents and humans. *Journal of Clinical Investigation* *121*, 2102–2110.
- 805 Guan, D., Xiong, Y., Borck, P.C., Jang, C., Doulias, P.T., Papazyan, R., Fang, B., Jiang, C.,  
806 Zhang, Y., Briggs, E.R., et al. (2018). Diet-Induced Circadian Enhancer Remodeling  
807 Synchronizes Opposing Hepatic Lipid Metabolic Processes. *Cell* *174*, 831-842.e12.
- 808 Heinz, S., Benner, C., Spann, N., Bertolino, E., Lin, Y.C., Laslo, P., Cheng, J.X., Murre, C.,  
809 Singh, H., and Glass, C.K. (2010). Simple Combinations of Lineage-Determining  
810 Transcription Factors Prime cis-Regulatory Elements Required for Macrophage and B Cell  
811 Identities. *Molecular Cell* *38*, 576–589.
- 812 Heinz, S., Romanoski, C.E., Benner, C., and Glass, C.K. (2015). The selection and function of  
813 cell type-specific enhancers. *Nature Reviews Molecular Cell Biology* *16*, 144–154.
- 814 Houten, S.M., Violante, S., Ventura, F. V., and Wanders, R.J.A. (2016). The Biochemistry and  
815 Physiology of Mitochondrial Fatty Acid  $\beta$ -Oxidation and Its Genetic Disorders. *Annual*  
816 *Review of Physiology* *78*, 23–44.
- 817 Huang, B., Wu, P., Bowker-Kinley, M.M., and Harris, R.A. (2002). Regulation of pyruvate  
818 dehydrogenase kinase expression by peroxisome proliferator-activated receptor- $\alpha$  ligands,  
819 glucocorticoids, and insulin. *Diabetes* *51*, 276–283.
- 820 Huang, D.W., Sherman, B.T., Tan, Q., Kir, J., Liu, D., Bryant, D., Guo, Y., Stephens, R.,  
821 Baseler, M.W., Lane, H.C., et al. (2007). DAVID Bioinformatics Resources: Expanded  
822 annotation database and novel algorithms to better extract biology from large gene lists.  
823 *Nucleic Acids Research* *35*.
- 824 Inagaki, T., Dutchak, P., Zhao, G., Ding, X., Gautron, L., Parameswara, V., Li, Y., Goetz, R.,  
825 Mohammadi, M., Esser, V., et al. (2007). Endocrine Regulation of the Fasting Response by

826 PPAR $\alpha$ -Mediated Induction of Fibroblast Growth Factor 21. *Cell Metabolism* 5, 415–425.  
827 Iroz, A., Montagner, A., Benhamed, F., Levavasseur, F., Polizzi, A., Anthony, E., Régnier, M.,  
828 Fouché, E., Lukowicz, C., Cauzac, M., et al. (2017). A Specific ChREBP and PPAR $\alpha$   
829 Cross-Talk Is Required for the Glucose-Mediated FGF21 Response. *Cell Reports* 21, 403–  
830 416.  
831 Janssen, A.W.F., Betzel, B., Stoopen, G., Berends, F.J., Janssen, I.M., Peijnenburg, A.A., and  
832 Kersten, S. (2015). The impact of PPAR $\alpha$  activation on whole genome gene expression in  
833 human precision cut liver slices. *BMC Genomics* 16.  
834 Jump, D.B., Tripathy, S., and Depner, C.M. (2013). Fatty acid-regulated transcription factors in  
835 the liver. *Annual Review of Nutrition* 33, 249–269.  
836 Karagianni, P., and Talianidis, I. (2015). Transcription factor networks regulating hepatic fatty  
837 acid metabolism. *Biochimica et Biophysica Acta - Molecular and Cell Biology of Lipids*  
838 1851, 2–8.  
839 Karolchik, D., Hinricks, A.S., Furey, T.S., Roskin, K.M., Sugnet, C.W., Haussler, D., and Kent,  
840 W.J. (2004). The UCSC table browser data retrieval tool. *Nucleic Acids Research* 32.  
841 Kent, W.J., Sugnet, C.W., Furey, T.S., Roskin, K.M., Pringle, T.H., Zahler, A.M., and Haussler,  
842 a. D. (2002). The Human Genome Browser at UCSC. *Genome Research* 12, 996–1006.  
843 Kersten, S. (2014). Integrated physiology and systems biology of PPAR $\alpha$ . *Molecular Metabolism*  
844 3, 354–371.  
845 Kersten, S., Seydoux, J., Peters, J.M., Gonzalez, F.J., Desvergne, B., and Wahli, W. (1999).  
846 Peroxisome proliferator-activated receptor  $\alpha$  mediates the adaptive response to fasting.  
847 *Journal of Clinical Investigation* 103, 1489–1498.  
848 Kersten, S., Rakhshandehroo, M., Knoch, B., and Müller, M. (2010). Peroxisome proliferator-  
849 activated receptor alpha target genes. *PPAR Research*.  
850 Lee, J., Ellis, J.M., and Wolfgang, M.J. (2015). Adipose fatty acid oxidation is required for  
851 thermogenesis and potentiates oxidative stress-induced inflammation. *Cell Reports* 10,  
852 266–279.  
853 Lee, J., Choi, J., Scafidi, S., and Wolfgang, M.J. (2016). Hepatic Fatty Acid Oxidation Restrains  
854 Systemic Catabolism during Starvation. *Cell Reports* 16, 201–212.  
855 Lee, J.M., Wagner, M., Xiao, R., Kim, K.H., Feng, D., Lazar, M.A., and Moore, D.D. (2014).  
856 Nutrient-sensing nuclear receptors coordinate autophagy. *Nature* 516, 112–115.  
857 Lee, S.S., Pineau, T., Drago, J., Lee, E.J., Owens, J.W., Kroetz, D.L., Fernandez-Salguero,  
858 P.M., Westphal, H., and Gonzalez, F.J. (1995). Targeted disruption of the alpha isoform of  
859 the peroxisome proliferator-activated receptor gene in mice results in abolishment of the

- 860 pleiotropic effects of peroxisome proliferators. *Molecular and Cellular Biology* *15*, 3012–  
861 3022.
- 862 Leone, T.C., Weinheimer, C.J., and Kelly, D.P. (1999). A critical role for the peroxisome  
863 proliferator-activated receptor  $\alpha$  (PPAR $\alpha$ ) in the cellular fasting response: The PPAR $\alpha$ -null  
864 mouse as a model of fatty acid oxidation disorders. *Proceedings of the National Academy*  
865 *of Sciences of the United States of America* *96*, 7473–7478.
- 866 Li, H., and Durbin, R. (2009). Fast and accurate short read alignment with Burrows-Wheeler  
867 transform. *Bioinformatics* *25*, 1754–1760.
- 868 Li, G., Brocker, C.N., Xie, C., Yan, T., Noguchi, A., Krausz, K.W., Xiang, R., and Gonzalez, F.J.  
869 (2018). Hepatic peroxisome proliferator-activated receptor alpha mediates the major  
870 metabolic effects of Wy-14643. *Journal of Gastroenterology and Hepatology (Australia)* *33*,  
871 1138–1145.
- 872 Li, H., Handsaker, B., Wysoker, A., Fennell, T., Ruan, J., Homer, N., Marth, G., Abecasis, G.,  
873 and Durbin, R. (2009). The Sequence Alignment/Map format and SAMtools. *Bioinformatics*  
874 *25*, 2078–2079.
- 875 Love, M.I., Huber, W., and Anders, S. (2014). Moderated estimation of fold change and  
876 dispersion for RNA-seq data with DESeq2. *Genome Biology* *15*, 550.
- 877 Mandard, S., Müller, M., and Kersten, S. (2004). Peroxisome proliferator-activated receptor  $\alpha$   
878 target genes. *Cellular and Molecular Life Sciences* *61*, 393–416.
- 879 Marini, F., and Binder, H. (2019). PcaExplorer: An R/Bioconductor package for interacting with  
880 RNA-seq principal components. *BMC Bioinformatics* *20*, 1–8.
- 881 Martinez-Jimenez, C.P., Kyrmizi, I., Cardot, P., Gonzalez, F.J., and Talianidis, I. (2010).  
882 Hepatocyte Nuclear Factor 4 Coordinates a Transcription Factor Network Regulating  
883 Hepatic Fatty Acid Metabolism. *Molecular and Cellular Biology* *30*, 565–577.
- 884 McDonnell, E., Crown, S.B., Fox, D.B., Kitir, B., Ilkayeva, O.R., Olsen, C.A., Grimsrud, P.A., and  
885 Hirschey, M.D. (2016). Lipids Reprogram Metabolism to Become a Major Carbon Source  
886 for Histone Acetylation. *Cell Reports* *17*, 1463–1472.
- 887 McLean, C.Y., Bristor, D., Hiller, M., Clarke, S.L., Schaar, B.T., Lowe, C.B., Wenger, A.M., and  
888 Bejerano, G. (2010). GREAT improves functional interpretation of cis-regulatory regions.  
889 *Nature Biotechnology* *28*, 495–501.
- 890 Naiman, S., Huynh, F.K., Gil, R., Glick, Y., Shahar, Y., Touitou, N., Nahum, L., Avivi, M.Y.,  
891 Roichman, A., Kanfi, Y., et al. (2019). SIRT6 Promotes Hepatic Beta-Oxidation via  
892 Activation of PPAR $\alpha$ . *Cell Reports* *29*, 4127-4143.e8.
- 893 Patsouris, D., Reddy, J.K., Müller, M., and Kersten, S. (2006). Peroxisome proliferator-activated



- 894 receptor  $\alpha$  mediates the effects of high-fat diet on hepatic gene expression. *Endocrinology*  
895 *147*, 1508–1516.
- 896 Ponziani, F.R., Pecere, S., Gasbarrini, A., and Ojetti, V. (2015). Physiology and pathophysiology  
897 of liver lipid metabolism. *Expert Review of Gastroenterology and Hepatology* *9*, 1055–1067.
- 898 Qin, Y., Grimm, S.A., Roberts, J.D., Chrysovergis, K., and Wade, P.A. (2020). Alterations in  
899 promoter interaction landscape and transcriptional network underlying metabolic adaptation  
900 to diet. *Nature Communications* *11*, 1–16.
- 901 Quinlan, A.R. (2014). BEDTools: The Swiss-Army tool for genome feature analysis. *Current*  
902 *Protocols in Bioinformatics* *2014*, 11.12.1-11.12.34.
- 903 Quinlan, A.R., and Hall, I.M. (2010). BEDTools: A flexible suite of utilities for comparing genomic  
904 features. *Bioinformatics* *26*, 841–842.
- 905 Raisner, R., Kharbanda, S., Jin, L., Jeng, E., Chan, E., Merchant, M., Haverty, P.M., Bainer, R.,  
906 Cheung, T., Arnott, D., et al. (2018). Enhancer Activity Requires CBP/P300 Bromodomain-  
907 Dependent Histone H3K27 Acetylation. *Cell Reports* *24*, 1722–1729.
- 908 Rakhshandehroo, M., Sanderson, L.M., Matilainen, M., Stienstra, R., Carlberg, C., De Groot,  
909 P.J., Müller, M., and Kersten, S. (2007). Comprehensive analysis of PPAR $\alpha$ -dependent  
910 regulation of hepatic lipid metabolism by expression profiling. *PPAR Research* *2007*.
- 911 Rakhshandehroo, M., Hooiveld, G., Müller, M., and Kersten, S. (2009). Comparative Analysis of  
912 Gene Regulation by the Transcription Factor PPAR $\alpha$  between Mouse and Human. *PLoS*  
913 *ONE* *4*, e6796.
- 914 Ramírez, F., Ryan, D.P., Grüning, B., Bhardwaj, V., Kilpert, F., Richter, A.S., Heyne, S., Dündar,  
915 F., and Manke, T. (2016). deepTools2: a next generation web server for deep-sequencing  
916 data analysis. *Nucleic Acids Research* *44*, W160–W165.
- 917 Reddy, J.K. (2001). Nonalcoholic steatosis and steatohepatitis III. Peroxisomal  $\beta$ -oxidation,  
918 PPAR $\alpha$ , and steatohepatitis. *American Journal of Physiology - Gastrointestinal and Liver*  
919 *Physiology* *281*.
- 920 Ross-Innes, C.S., Stark, R., Teschendorff, A.E., Holmes, K.A., Ali, H.R., Dunning, M.J., Brown,  
921 G.D., Gojis, O., Ellis, I.O., Green, A.R., et al. (2012). Differential oestrogen receptor binding  
922 is associated with clinical outcome in breast cancer. *Nature* *481*, 389–393.
- 923 Ruppert, P.M.M., Park, J.G., Xu, X., Hur, K.Y., Lee, A.H., and Kersten, S. (2019).  
924 Transcriptional profiling of PPAR $\alpha$ -/- and CREB3L3/- livers reveals disparate regulation of  
925 hepatoproliferative and metabolic functions of PPAR $\alpha$ . *BMC Genomics* *20*.
- 926 Selen, E.S., Choi, J., and Wolfgang, M.J. (2021). Discordant hepatic fatty acid oxidation and  
927 triglyceride hydrolysis leads to liver disease. *JCI Insight* *6*.



- 928 Shechter, D., Dormann, H.L., Allis, C.D., and Hake, S.B. (2007). Extraction, purification and  
929 analysis of histones. *Nature Protocols* 2, 1445–1457.
- 930 Sommars, M.A., Ramachandran, K., Senagolage, M.D., Futtner, C.R., Germain, D.M., Allred,  
931 A.L., Omura, Y., Bederman, I.R., and Barish, G.D. (2019). Dynamic repression by BCL6  
932 controls the genome-wide liver response to fasting and steatosis. *ELife* 8.
- 933 Song, S., Attia, R.R., Connaughton, S., Niesen, M.I., Ness, G.C., Elam, M.B., Hori, R.T., Cook,  
934 G.A., and Park, E.A. (2010). Peroxisome proliferator activated receptor  $\alpha$  (PPAR $\alpha$ ) and  
935 PPAR gamma coactivator (PGC-1 $\alpha$ ) induce carnitine palmitoyltransferase 1A (CPT-1A) via  
936 independent gene elements. *Molecular and Cellular Endocrinology* 325, 54–63.
- 937 Stark, R., and Brown, G. (2011). DiffBind: differential binding analysis of ChIP-Seq peak data.  
938 <http://bioconductor.org/packages/release/bioc/vignettes/DiffBind/inst/doc/DiffBind.pdf>.
- 939 Stern, J.H., Rutkowski, J.M., and Scherer, P.E. (2016). Adiponectin, Leptin, and Fatty Acids in  
940 the Maintenance of Metabolic Homeostasis through Adipose Tissue Crosstalk. *Cell*  
941 *Metabolism* 23, 770–784.
- 942 Thakur, A., Wong, J.C.H., Wang, E.Y., Lotto, J., Kim, D., Cheng, J.C., Mingay, M., Cullum, R.,  
943 Moudgil, V., Ahmed, N., et al. (2019). Hepatocyte Nuclear Factor 4-Alpha Is Essential for  
944 the Active Epigenetic State at Enhancers in Mouse Liver. *Hepatology* 70, 1360–1376.
- 945 The, B., and Schulz, H. (1991). Beta oxidation of fatty acids. *Biochimica et Biophysica Acta*  
946 (BBA) - Lipids and Lipid Metabolism 1081, 109–120.
- 947 Tusher, V.G., Tibshirani, R., and Chu, G. (2001). Significance analysis of microarrays applied to  
948 the ionizing radiation response. *Proceedings of the National Academy of Sciences of the*  
949 *United States of America* 98, 5116–5121.
- 950 Wickham, H. (2016). *ggplot2: Elegant Graphics for Data Analysis* (New York: Springer-Verlag).
- 951 Wu, P., Peters, J.M., and Harris, R.A. (2001). Adaptive increase in pyruvate dehydrogenase  
952 kinase 4 during starvation is mediated by peroxisome proliferator-activated receptor  $\alpha$ .  
953 *Biochemical and Biophysical Research Communications* 287, 391–396.
- 954 Zhang, Y., Liu, T., Meyer, C.A., Eeckhoute, J., Johnson, D.S., Bernstein, B.E., Nussbaum, C.,  
955 Myers, R.M., Brown, M., Li, W., et al. (2008). Model-based analysis of ChIP-Seq (MACS).  
956 *Genome Biology* 9, R137.
- 957 Zhu, A., Ibrahim, J.G., and Love, M.I. (2019). Heavy-Tailed prior distributions for sequence  
958 count data: Removing the noise and preserving large differences. *Bioinformatics* 35, 2084–  
959 2092.
- 960
